1 Original research manuscript deposited as pre-print in *bioRxiv*

2

3 **Enriching and aggregating purple non-sulfur bacteria in an anaerobic**  
4 **sequencing-batch photobioreactor for nutrient capture from wastewater**

5

6 Marta Cerruti<sup>1,§</sup>, Berber Stevens<sup>1,§</sup>, Sirous Ebrahimi<sup>1,2</sup>, Abbas Alloul<sup>3</sup>, Siegfried E. Vlaeminck<sup>3</sup>,

7 David G. Weissbrodt<sup>1,§,\*</sup>

8

9 <sup>1</sup> Department of Biotechnology, Delft University of Technology, van der Maasweg 9, 2629 HZ

10 Delft, Netherlands

11 <sup>2</sup> Department of Chemical Engineering, Sahand University of Technology, Tabriz, East

12 Azerbaijan, Iran

13 <sup>3</sup> Research Group of Sustainable Energy, Air and Water Technology, Department of Bioscience

14 Engineering, University of Antwerp, Groenenborgerlaan 171, 2020 Antwerpen, Belgium

15

16 <sup>§</sup> Equal contribution

17

18 \*Correspondence: Prof. David Weissbrodt, Assistant Professor, Weissbrodt Group for

19 Environmental Life Science Engineering, Environmental Biotechnology Section, Department

20 of Biotechnology, Faculty of Applied Sciences, Delft University of Technology, van der

21 Maasweg 9, 2629 HZ Delft, Netherlands; Phone: +31 15 27 81169; E-mail:

22 [d.g.weissbrodt@tudelft.nl](mailto:d.g.weissbrodt@tudelft.nl).

23

24 Running title: Mixed-culture PNSB process in a sequencing-batch photobioreactor

## 25 **Abstract**

26 Purple non-sulfur bacteria (PNSB), a guild of anoxygenic photomixotrophic organisms, rise  
27 interest to capture nutrients from wastewater in mixed-culture bioprocesses. One challenge  
28 targets the aggregation of PNSB biomass through gravitational separation from the treated  
29 water to facilitate its retention and accumulation, while avoiding the need for membranes. We  
30 aimed to produce an enriched, concentrated, well-settling, nutrient-removing PNSB biomass  
31 using sequencing batch regimes (SBR) in an anaerobic photobioreactor. The stirred tank was  
32 fed with a synthetic influent mimicking loaded municipal wastewater ( $430\text{-}860\text{ mg COD}_{\text{Ac}}\text{ L}_{\text{Inf}}^{-1}$ ,  
33  $\text{COD:N:P}$  ratio of  $100:36:4\text{-}100:11:2\text{ m/m/m}$ ), operated at  $30^{\circ}\text{C}$  and  $\text{pH } 7$ , and continuously  
34 irradiated with infrared (IR) light ( $>700\text{ nm}$ ) at  $375\text{ W m}^{-2}$ . After inoculation with activated  
35 sludge at  $0.1\text{ g VSS L}^{-1}$ , PNSB were rapidly enriched in a first batch of 24 h: the genus  
36 *Rhodobacter* reached 54% of amplicon sequencing read counts. SBR operations at volume  
37 exchange ratio of 50% with decreasing hydraulic retention times (48 to 16 h; 1 to 3 cycles  $\text{d}^{-1}$ )  
38 and increasing volumetric organic loading rates ( $0.2$  to  $1.3\text{ kg COD m}^{-3}\text{ d}^{-1}$ ) stimulated the  
39 aggregation (compact granules of  $50\text{-}150\text{ }\mu\text{m}$ ), settling (sedimentation G-flux of  $4.7\text{ kg h}^{-1}\text{ m}^{-2}$ ),  
40 and accumulation (as high as  $3.8\text{ g VSS L}^{-1}$ ) of biomass. The sludge retention time (SRT)  
41 increased freely from 2.5 to 11 d without controlled sludge wasting. Acetate, ammonium, and  
42 orthophosphate were removed simultaneously (up to 96% at a rate of  $1.1\text{ kg COD m}^{-3}\text{ d}^{-1}$ , 77%  
43 at  $113\text{ g N m}^{-3}\text{ d}^{-1}$ , and 73% at  $15\text{ g P m}^{-3}\text{ d}^{-1}$ ) with a  $\text{COD:N:P}$  assimilation ratio of  $100:6.7:0.9$   
44 ( $\text{m/m/m}$ ). Competition for substrate and photons occurred in the PNSB guild. SBR regime shifts  
45 sequentially selected for *Rhodobacter* (90%) under shorter SRT and non-limiting acetate  
46 concentrations during reaction phases, *Rhodopseudomonas* (70%) under longer SRT and  
47 acetate limitation, and *Blastochloris* (10%) under higher biomass concentrations. We  
48 highlighted the benefits of a PNSB-based SBR process for biomass accumulation and  
49 simultaneous nutrient capture at substantial rates, and its underlying microbial ecology.

50 **Keywords:** biological wastewater treatment; nutrient recovery; purple phototrophic bacteria;  
 51 flocculation; sequencing batch reactor; microbial selection.

52

53 **Graphical abstract**

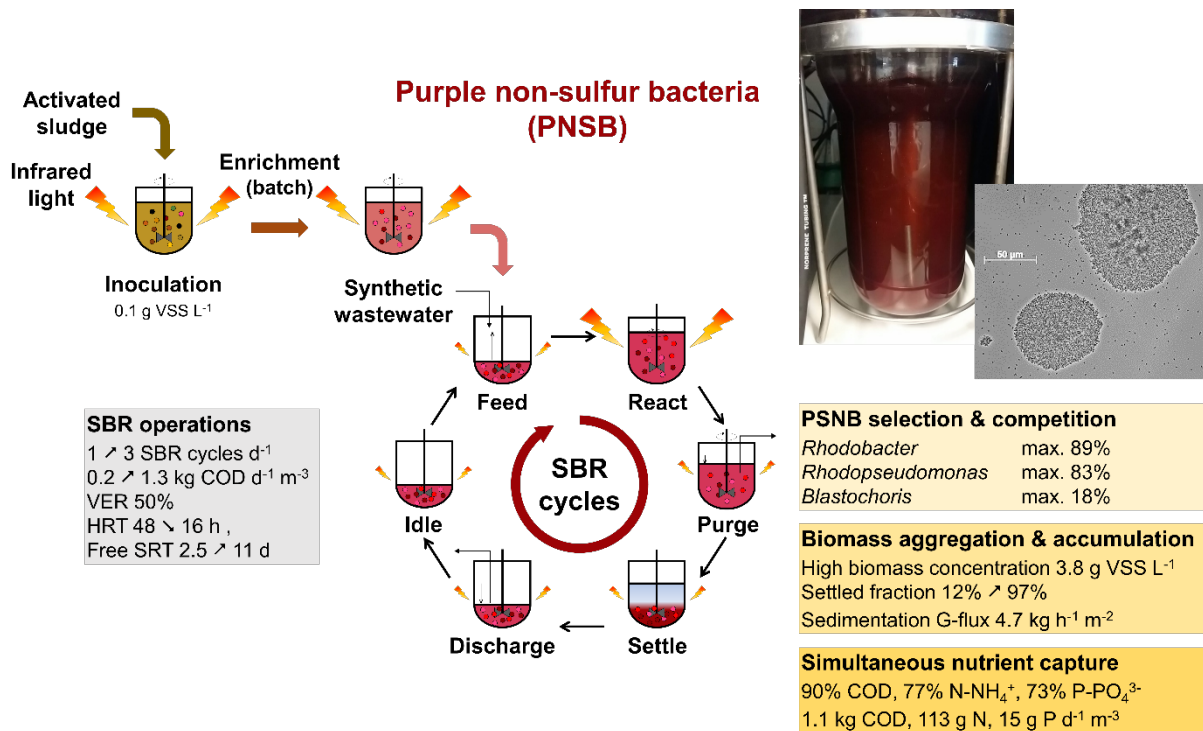

54

55

56 **Highlights**

- 57 • PNSB were highly enriched (90%) in an anaerobic stirred-tank photobioreactor.
- 58 • The mixed-culture SBR process fostered PNSB biomass aggregation and accumulation.
- 59 • PNSB sludge reached 3.8 g VSS L<sup>-1</sup> and a sedimentation G-flux of 4.7 kg h<sup>-1</sup> m<sup>-2</sup>.
- 60 • PNSB enabled a high simultaneous removal of COD (96%), N (77%), and P (73%).
- 61 • *Rhodobacter*, *Rhodopseudomonas*, and *Blastochloris* competed for acetate and photons.

62

## 63 **1 Introduction**

64 Biological nutrient removal (BNR) is one of the main goals of wastewater treatment to  
65 safeguard aquatic ecosystems from anoxia and eutrophication. Water quality regulations  
66 become stricter on the limits of nutrient discharge and removal. European quality criteria target  
67 the following residual concentrations and removal of organic matter (125 mg COD<sub>Tot</sub> L<sup>-1</sup> and  
68 75% removal; 25 mg BOD<sub>5</sub> L<sup>-1</sup> and 70-90% removal), nitrogen (10-15 mg N<sub>Tot</sub> L<sup>-1</sup>, 70-80%  
69 removal), and phosphorus (1-2 mg P<sub>Tot</sub> L<sup>-1</sup>, 80% removal) in Europe (EUR-Lex, 1991;  
70 Guimarães et al., 2018). Besides conventional activated sludge systems, research and  
71 innovation target the use of novel microbial processes for water resource recovery (Alloul et  
72 al., 2018; Guest et al., 2009; Verstraete and Vlaeminck, 2011) on top of pollution control.

73

74 In the resource recovery context, purple non-sulfur bacteria (PNSB) – also referred to purple  
75 phototrophic bacteria – can propel a sustainable treatment by capturing nutrient resource from  
76 used water (Puyol et al., 2017b; Verstraete et al., 2016), valorizing entropic waste into biomass,  
77 bioenergy, bulk chemicals, and biomaterials. PNSB form an attractive guild of anoxygenic,  
78 photosynthetic, photoheterotrophic organisms that perform a cyclic photophosphorylation with  
79 a facultative anaerobic and hyperversatile metabolism that allows them to grow under ever-  
80 changing environmental conditions (Imhoff, 2017; van Niel, 1944). They populate the surface  
81 of aquatic environments by accessing and absorbing sunlight energy using carotenoids and  
82 bacteriochlorophylls. The spectrum of infrared (IR) electromagnetic wavelengths (800-1200  
83 nm) of light provides them with a competitive advantage in a mixed-culture microbial  
84 ecosystem. PNSB can switch between photoorganoheterotrophy, photolithoautotrophy,  
85 respiratory or fermentative chemoorgano-heterotrophy, respiratory chemolithoautotrophy, and  
86 nitrogen fixation (under ammonium limitations), depending on the composition of electron  
87 donors and acceptors present in their surrounding (Madigan and Jung, 2009). This enables them

88 to thrive on different pools of electron donors, recycle electrons, achieve redox homeostasis,  
89 and grow under alternation of light and dark (McEwan, 1994). PNSB ferment reduced organics  
90 into carboxylates in the dark, photoferment them into dihydrogen, or accumulate and condense  
91 them as intracellular storage polymers like biopolyesters (*e.g.*, poly- $\beta$ -hydroxyalkanoates,  
92 PHAs) as electron sinks under nutrient limitations (Hustede et al., 1993). Rediscovering PNSB  
93 for ecotechnologies and nutrient capture goes via basic study of their metabolic and selection  
94 features from pure to mixed cultures, and eco-design to develop robust, non-axenic, and  
95 economically appealing processes (Bryant and Frigaard, 2006).

96

97 Their photon-capturing and energy-recycling physiology lead PNSB to achieve rapid biomass  
98 specific maximum growth rates ( $\mu_{\max}$ ) of 1.7 to 5.3 d<sup>-1</sup> and high biomass yields ( $Y_{X/COD}$ ) on  
99 organic substrates (expressed as chemical oxygen demand, COD) of 0.6 to 1.2 g COD<sub>X</sub> g<sup>-1</sup>  
100 CODs (Eroglu et al., 1999; Hülsen et al., 2014). Electron-balance-wise, this highlights that  
101 PNSB can involve additional electron sources from the bulk liquid phase for growth above 1 g  
102 COD<sub>X</sub> g<sup>-1</sup> CODs. Although primarily known as anoxygenic phototrophs, this may happen under  
103 conditions that lead PNSB to harness electrons from water molecules like oxygenic  
104 photolithoautotrophs. PNSB can assimilate carbon (C), nitrogen (N), and phosphorus (P) from  
105 wastewater at COD:N:P ratio of 100:7:2 m/m/m. with an elemental formula for purple  
106 phototrophic biomass given as C<sub>1</sub>H<sub>1.8</sub>O<sub>0.38</sub>N<sub>0.18</sub> (degree of reduction of 4.5 mol e<sup>-</sup> C-mol<sup>-1</sup> X<sub>PPB</sub>)  
107 (Puyol et al., 2017a). A ratio of 100:5:1 m/m/m and elemental formula of C<sub>1</sub>H<sub>1.8</sub>O<sub>0.5</sub>N<sub>0.2</sub> has  
108 typically been considered for a conventional activated sludge (excl. polyphosphate-  
109 accumulating organisms) at a sludge age of 5-8 d (Heijnen and Kleerebezem, 2010; Henze et  
110 al., 2000). The potential of PNSB for converting diverse carbon sources such as acetate, malate,  
111 butyrate and propionate has been screened with isolates (Alloul *et al.*, 2019; Madigan & Gest,  
112 1979a; Stoppani *et al.*, 1954), underlying the potential of populations of this guild for water

113 treatment. As phototrophs, PNSB directly use the photonic energy to activate the electrons  
114 delivered from electron donors, therefore, maximizing their biomass yield. In contrast, new-  
115 generation biological wastewater treatment processes aim to decrease sludge production and  
116 handling, by making use of slow-growing and low-yield microorganisms such as  
117 polyphosphate-accumulating and anammox bacteria. The use of organisms with a high biomass  
118 yield such as PNSB is of definite interest to capture and concentrate carbon, nitrogen and  
119 phosphorus nutrient resources out of the wastewater by assimilation into the biomass without  
120 need to dissimilate these for energy generation. The produced biomass can be valorized to  
121 generate energy through methanization and to produce, *e.g.*, single-cell proteins (*i.e.*, source of  
122 microbial proteins), bioplastics via PHAs, and biohydrogen on concentrated streams (Honda et  
123 al., 2006; Puyol et al., 2017b).

124

125 Technically, one important challenge of photobiotechnologies resides in the limitation of  
126 photon supply across the reactor bulk (Pulz O., 2001). Light limitation is often considered *a*  
127 *priori* as a killing factor for the process performance and economics. Therefore, many PNSB-  
128 based processes have been operated at concentrations below 1 g VSS L<sup>-1</sup> to potentially prevent  
129 light limitation. Such low biomass concentration can remain a drawback for the intensification  
130 of volumetric conversions in the bioprocess.

131

132 PNSB have been widely used in pure-culture biotechnologies, *e.g.*, for the production of  
133 biohydrogen and biopolymers (Frigaard, 2016; Lenz and Marchessault, 2005; Luongo et al.,  
134 2017; Nandi and Sengupta, 1998). Mixed-culture PSNB processes are actively investigated to  
135 harness the ability of PNSB to treat wastewater (Hülßen et al., 2016; Nakajima et al., 1997;  
136 Verstraete et al., 2016), following the widespread presence and use of these microorganisms in  
137 stabilization ponds (Almasi and Pescod, 1996; Freedman et al., 1983). Process configurations

138 involved continuous upflow system (Driessens et al., 1987), continuous-flow stirred tank  
139 reactor (Alloul et al., 2019), tubular reactor (Carlozzi et al., 2006), sequencing batch reactor  
140 (SBR) (Chitapornpan et al., 2012; Fradinho et al., 2013), membrane bioreactor (MBR) (Hülse  
141 et al., 2016), and membrane sequencing batch reactor (MSBR) (Kaewsuk et al., 2010). One  
142 challenge in the application of PNSB organisms is considered to remain in the solid-liquid (S/L)  
143 separation of the biomass from the aqueous stream. Decoupling the hydraulic (HRT) and solid  
144 (SRT) retention times is crucial to retain the biomass in the process. The use of membrane  
145 filtration has been recommended because PNSB have been hypothesized to primarily grow in  
146 suspension for catching photons and to settle slowly (Chitapornpan et al., 2012). However,  
147 membranes are intended to separate biomass from the treated wastewater, but do not foster the  
148 formation of a good settling sludge. In the lab, MBRs are typically used to maintain biomass in  
149 suspension (van der Star et al., 2008). A centrifugation step is still needed after the membrane  
150 filtration to efficiently concentrate and harvest the PNSB biomass downstream. Thus,  
151 alternatives to MBRs can lead to capital and operational savings, since membrane filtration and  
152 fouling relate to substantial pumping energy and maintenance costs besides the use of plastic  
153 materials. Intensification of PNSB-based environmental biotechnology processes should be  
154 targeted by enhancing the bioaggregation and biofilm-forming ability of the biomass. Although  
155 previous works have not tailored SBR regimes to this end (Chitapornpan et al., 2012; Fradinho  
156 et al., 2013), the application of substrate gradients via SBR operation can be efficient to  
157 stimulate microbial aggregation and biomass accumulation, such as typically shown when  
158 aiming to granulate activated sludge biomasses (Aqeel et al., 2019; Pronk et al., 2015; Winkler  
159 et al., 2018). This should lead to an efficient S/L separation, resulting in lowering costs for  
160 downstream processing by potentially reducing the need for ultrafiltration and centrifugation to  
161 concentrate the biomass. A SBR design also offers operational flexibility (Morgenroth and  
162 Wilderer, 1998) to manipulate reactor cycles and loading rates. Although offering less surface-

163 to-volume ratio, the use of simple stirred-tank designs in SBR application can in addition lead  
164 to simpler scale-up than flat-sheet, tubular, or membrane-based processes.

165

166 Here, we investigated the possibility to develop a mixed-culture biotechnology process based  
167 on the enrichment of a concentrated and well-settling PNSB biomass out of activated sludge in  
168 a stirred-tank photobioreactor operated under SBR regime and continuously irradiated with IR  
169 light. Conditions to enrich and maintain a PNSB mixed culture were elucidated at bench, along  
170 with microbial competition in the PNSB guild. Biomass growth, aggregation, and composition  
171 were analysed along with volumetric rates of C-N-P removal. The here-examined microbial  
172 ecology insights and aggregation propensity of the PNSB guild can sustain the development of  
173 bioengineering strategies for mixed-culture process development in simple SBR design for  
174 wastewater treatment and resource recovery from aqueous nutrient streams.

175



## 176 **2 Material and Methods**

177

### 178 **2.1 Anaerobic, sequencing-batch, stirred-tank photobioreactor setup**

179 The PNSB enrichment was performed in a 1.5-L cylindrical, single-wall, glass, stirred-tank  
180 reactor (Applikon Biotechnology, Netherlands) (Figure 1.A). The reactor was inoculated at 0.1  
181 g VSS L<sup>-1</sup> of flocculent activated sludge taken from the BNR WWTP Harnaspolder (the  
182 Netherlands) after washing the sludge with the cultivation medium 3 times. The reactor  
183 operated for 6 months under SBR regime at controlled temperature of 30 ± 1 °C and pH of 7.0  
184 ± 1.0 on an acetate-based synthetic wastewater.

185

186 The cultivation medium was calculated based on stoichiometric requirements to sustain PNSB  
187 growth and complemented with other minerals adapted from Kaewsuk et al. (2010) to meet  
188 with C-N-P anabolic requirements of PNSB. The stock solution consisted of (per liter): 0.914  
189 g of CH<sub>3</sub>COONa·3H<sub>2</sub>O, 0.014 g of KH<sub>2</sub>PO<sub>4</sub>, 0.021 g of K<sub>2</sub>HPO<sub>4</sub>, 0.229 g of NH<sub>4</sub>Cl, 0.200 g of  
190 MgSO<sub>4</sub>·7H<sub>2</sub>O, 0.200 g of NaCl, 0.050 g of CaCl<sub>2</sub>·2H<sub>2</sub>O, 0.100 g of yeast extract, 1 mL of  
191 vitamin solution, and 1 mL of trace metal solution. The vitamin solution contained (per liter)  
192 200 mg of thiamine-HCl, 500 mg of niacin, 300 mg of p-amino-benzoic acid, 100 mg of  
193 pyridoxine-HCl, 50 mg of biotin, and 50 mg of vitamin B12. The trace metal solution contained  
194 (per liter) 1100 mg of EDTA-2Na·2H<sub>2</sub>O, 2000 mg of FeCl<sub>3</sub>·6H<sub>2</sub>O, 100 mg of ZnCl<sub>2</sub>, 64 mg  
195 of MnSO<sub>4</sub>·H<sub>2</sub>O, 100 mg of H<sub>3</sub>BO<sub>3</sub>, 100 mg of CoCl<sub>2</sub>·6H<sub>2</sub>O, 24 mg of Na<sub>2</sub>MoO<sub>4</sub>·2H<sub>2</sub>O, 16 mg  
196 of CuSO<sub>4</sub>·5H<sub>2</sub>O, 10 mg of NiCl<sub>2</sub>·6H<sub>2</sub>O, and 5 mg of NaSeO<sub>3</sub>. Carbon sources were separated  
197 from nitrogen and phosphate sources to avoid contaminations.

198

199 To select for purple phototrophs and to avoid the proliferation of green phototrophs, the reactor  
200 was placed in a dark fume hood providing only IR light. A white light source was beamed with  
201 two halogen lamps (120 W, Breedstraler, GAMMA, Netherlands) placed at the side of the  
202 reactor and filtered for IR wavelengths ( $>700$  nm) with two filter sheets (Black Perspex 962,  
203 Plasticstockist, UK) placed in front of the lamps. Irradiance was measured at the reactor surface  
204 with a pyranometer (CMP3, Kipp & Zonen, Netherlands) and set at a relatively high value of  
205  $375 \text{ W m}^{-2}$  to promote PNSB enrichment and biomass growth.

206

207 >> Figure 1

208

209 After a first 40 h of batch regime to check for the selection of PNSB, the system was switched  
210 to an SBR regime, consisting of discharge, idle, feed and settling phases (Figure 1.B). Different  
211 cycle timings and HRT, reaction phase length, and COD loading rates were tested as followed  
212 in three operational modes. In *SBR1*, 24 cycles of 24 h each were applied (*i.e.*, 24 days of  
213 experiment), consisting of: biomass settling (3 h) effluent withdrawal (5 min), influent feeding  
214 (5 min), and reaction (20.75 h). In *SBR2*, the total length of the cycles was decreased 3-fold and  
215 set at 8 h. The reaction phase was shortened to 4.75 h, while all the other phases were  
216 maintained. The reactor was operated over 205 cycles. In *SBR3*, the cycle composition was  
217 maintained as in *SBR2*, while the COD concentration was doubled from 430 to 860 mg  $\text{COD}_{\text{Ac}}$   
218  $\text{L}^{-1}$  in the influent to prevent COD-limitations along the reaction phase. All SBRs were operated  
219 at a volume exchange ratio of 50%. The stepwise adaptation of the SBR operations from 1 to 3  
220 cycles  $\text{day}^{-1}$  resulted in HRTs from 48 h (*SBR1*) to 16 h (*SBR2* and *SBR3*) and in volumetric  
221 organic loading rates (OLRs) of 0.215 (*SBR1*) to 0.645 (*SBR2*) and 1.290 (*SBR3*)  $\text{kg COD d}^{-1}$   
222  $\text{m}^{-3}$  (Table 1). The sludge retention time (SRT) was let freely evolve across the SBR operations

223 without controlled purge of the biomass, with median values ranging from 1.5 to 11 d as  
224 calculated from eq. 2 in Supplementary material 1, as a result of biomass accumulation.

225

226 The pH of the mixed liquor was controlled at  $7.0 \pm 1.0$  by automatic addition of HCl or NaOH  
227 at  $1 \text{ mol L}^{-1}$  each. The bulk liquid was sparged with argon gas (quality 99.999%) to maintain  
228 anaerobic conditions, while continuously stirring at 378 rpm (potentiostat ADI 1012, Applikon,  
229 the Netherlands) during the reaction phase.

230

231 >> Table 1

232

## 233 **2.2 Analytical methods to measure growth and nutrient consumptions**

### 234 *2.2.1 Measurements of biomass growth and nutrient concentrations.*

235 Biomass growth was monitored spectrophotometrically by absorbance at a wavelength of 660  
236 nm (DR3900, Hach, Germany) 4-5 times a week (Supplementary material 2), and  
237 gravimetrically by quantifying the concentration of volatile suspended solids (VSS) as  
238 described in experimental methods for wastewater treatment (van Loosdrecht et al., 2016). For  
239 the 40-batch and SBR1, absorbance measurements were adequate since the biomass was low  
240 concentrated and in suspension. For SBR2 and SBR3, the biomass aggregated and VSS  
241 measurements were much more accurate.

242

243 The consumption of the dissolved nutrients was monitored by sampling the mixed liquor at the  
244 beginning and end of the reaction phase, after centrifugation (5 min, 17000 x g) and filtration  
245 of the supernatant on 0.45- $\mu\text{m}$  filters (Millex-HV, PVDF, Germany). The concentrations of  
246 COD, ammonium (as  $\text{N-NH}_4^+$ ) and orthophosphate (as  $\text{P-PO}_4^{3-}$ ) were measured by colorimetric  
247 assays (LCK kits no. 114/614/COD, 302/303/ammonium, 348/350/phosphate; Hach-Lange,

248 Dusseldorf, Germany) followed by spectrophotometry (DR3900, Hach, Germany). The COD  
249 colorimetric method measured all oxidizable substances (here notably acetate, yeast extract,  
250 and EDTA from the trace element solution). As technical control, samples were measured in  
251 triplicates and the relative standard deviation was 0.5 - 1.9%.

252

253 Acetate concentrations were measured specifically with a high-performance liquid  
254 chromatograph (HPLC, Waters, United States) equipped with a Biorad Aminex separation  
255 column (HPX-87H, Waters, United States) and an ultraviolet and refraction index (UV/RI)  
256 detector (2489, Waters, United States), and using a mobile phase at 1.5 mol H<sub>3</sub>PO<sub>4</sub> L<sup>-1</sup> supplied  
257 at a flowrate of 0.6 mL min<sup>-1</sup> and temperature of 60 °C.

258

### 259 *2.2.2 Computations of microbial conversions and extraction of growth parameters*

260 All symbols and equations used to compute microbial conversions and extraction of growth  
261 parameters are available in Supplementary material 1.

262

263 In short, the average percentage of removal ( $\eta_s$ , %), total rate of nutrient removal ( $R_s$ , kg S d<sup>-1</sup>)  
264 <sup>1</sup>), apparent volumetric rate of removal of nutrients ( $r_s$ , kg S d<sup>-1</sup> m<sup>-3</sup>), and apparent growth rate  
265 ( $\mu_{max}$ , d<sup>-1</sup>) were calculated using mass balances over the C-N-P nutrients and biomass at a  
266 volumetric exchange ratio (VER) of 50%. Measurements of nutrients were performed at the  
267 beginning and end of the batch reaction phases of the SBR. Influent concentrations were back-  
268 calculated using the VER. The concentrations of nutrients in the effluent were assumed identical  
269 as at the end of the reaction phase.

270

271 Basic kinetic and stoichiometric parameters for microbial conversions and growth were  
272 assessed from nutrient consumptions and biomass production profiles using Aquasim (Reichert,

1994). A mathematical model was constructed using mass balances for substrate consumption and biomass production, and fitted to the experimental data. The maximum biomass-specific rate of acetate consumption ( $q_{S,max}$ , kg S d<sup>-1</sup> kg X), maximum yield of biomass production on substrate ( $Y_{X/S,max}$ , kg X kg<sup>-1</sup> S), and maintenance rate on substrate ( $m_S$ , kg S d<sup>-1</sup> kg X) were derived by parameter fit from the Herbert-Pirt relation of substrate allocation for growth and maintenance. The biomass-specific maximum rate of growth ( $\mu_{max}$ , d<sup>-1</sup>) was computed from the relation between  $q_{S,max}$  and  $Y_{X/S,max}$ , assuming the maintenance rate negligible versus the maximum growth rate during the exponential phase of the batch reaction period.

281

## 2.3 Analysis of biomass and microbial community compositions

### 2.3.1 *Light microscopy analysis of microbial morphotypes and bioaggregates*

Microbial morphotypes present in the enrichment were visually observed by phase contrast microscopy (Axioplan 2, Zeiss, Germany).

286

### 2.3.2 *Wavelength scan analysis of pigment content in the PNSB-enriched biomass*

The evolution of the biomass contents in bacteriochlorophyll a (BChl a) and carotenoids in the biomass was used as a proxy for tracking the PNSB enrichment in the mixed liquor. Measurements were performed by wavelength scan over the visible and near-infrared spectrum from 400 to 1000 nm (DR3900, Hach, Germany). A focus was attributed to absorbance peaks between 800-900 nm (BChl a) and 400-600 nm (carotenoids).

293

### 2.3.3 *V3-V4 16S rRNA gene amplicon sequencing of bacterial community compositions*

Genomic DNA was extracted from biomass samples throughout the duration of the experiment, using UltraClean Microbial Isolation kits (MOBIO laboratories, Inc., USA) following

297 manufacturer's instructions, and stored at -20 °C. The concentrations and qualities of the DNA  
298 extracts were measured by Qbit3 fluorimeter (Thermofisher Scientific, USA), according to  
299 manufacturer's instructions. The DNA extracts were sent to Novogene (China) for amplicon  
300 sequencing. The V3-V4 regions of the 16S rRNA gene were amplified by polymerase chain  
301 reaction (PCR) using the set of forward V3-V4 forward 341f (5'- CCTACGGGAGGCAGCAG  
302 -3') and reverse 806r (5'- GGACTACHVGGGTWTCTAAT-3') primers (Takahashi *et al.*,  
303 2014). The amplicon sequencing libraries were pooled and sequenced in an Illumina paired-  
304 end platform. After sequencing, the raw read were quality filtered, chimeric sequences were  
305 removed and OTUs were generated on the base of  $\geq 97\%$  identity. Subsequently, microbial  
306 community analysis was performed by Novogene using Mothur & Qiime software (V1.7.0).  
307 For phylogenetical determination the most recent SSURef database from SILVA  
308 (<http://www.arb-silva.de/>) was used. Relative abundances of OTUs were reported as % total  
309 sequencing reads count.  
310

## 311 **3 Results**

312

### 313 **3.1 High, simultaneous nutrient removal was achieved in the PNSB-enriched SBR**

314 The nutrient removal performances achieved by the PNSB-based process from SBR1 to SBR2  
315 and SBR3 regimes are displayed in figure 2 and Table 2. The detailed dynamics in nutrient and  
316 biomass concentrations and compositions are provided in Supplementary material 3.

317

#### 318 *3.1.1 Nutrient removing activities were detected during the initial batch*

319 During the first 40 h of batch used to activate the biomass, nutrients were removed at 98 %  
320 COD, 52 % N-NH<sub>4</sub><sup>+</sup>, and 60% P-PO<sub>4</sub><sup>3-</sup> (Figure 2.A). These related to apparent volumetric  
321 removal rates of  $0.190 \pm 0.048$  kg COD d<sup>-1</sup> m<sup>-3</sup>,  $21.5 \pm 8.6$  g N d<sup>-1</sup> m<sup>-3</sup>, and  $2.5 \pm 0.5$  mg P d<sup>-1</sup>  
322 m<sup>3</sup> (Figure 2.B). The COD:N:P consumption ratio was 100:7.5:0.12 (m/m/m) in this batch.

323

#### 324 *3.1.2 A complete removal of acetate was achieved across all SBR operation modes*

325 During SBR1, the average percentage of removal of the acetate-based biodegradable COD was  
326 96%, with an average volumetric consumption rate of  $0.220 \pm 0.060$  kg COD d<sup>-1</sup> m<sup>-3</sup>. During  
327 SBR2, 96% of the COD was removed as well at a 4-fold higher rate of  $0.891 \pm 0.235$  kg COD  
328 d<sup>-1</sup> m<sup>-3</sup>. The carbon was fully removed over the first hour of the reaction phase, resulting in  
329 remaining 3.75 h of substrate limitation. During SBR3, the COD load in the influent was  
330 doubled, and as a result, no nutrient limitation occurred during the reaction phase. COD  
331 remained highly removed at 91%, with a volumetric removal rate of  $1.08 \pm 0.32$  kg d<sup>-1</sup> m<sup>-3</sup>.

332

333 3.1.3 A maximum of 85% of ammonium and 74% of phosphate was removed from the inflow

334 The ammonium removal rates increased from  $26 \pm 13 \text{ g N-NH}_4^+ \text{ d}^{-1} \text{ m}^{-3}$  in SBR1 to  $83.4 \pm 35$

335  $\text{g N d}^{-1} \text{ m}^{-3}$  during SBR2, and  $113.3 \pm 62 \text{ g N d}^{-1} \text{ m}^{-3}$  during SBR3. Average N-removal

336 percentages evolved from 53% to 44% and 77% of the ammonium load across the three SBRs,

337 respectively. Removal rates of orthophosphate increased from  $3.0 \pm 0.7 \text{ g P-PO}_4^{3-} \text{ d}^{-1} \text{ m}^{-3}$  of

338 SBR1 to  $10.7 \pm 4.5 \text{ g P d}^{-1} \text{ m}^{-3}$  in SBR2 and  $15.2 \pm 4.6 \text{ g P d}^{-1} \text{ m}^{-3}$  in SBR3, with average P-

339 removal percentages of 57, 45 and 73% per cycle, respectively. Under the non-limiting COD

340 conditions of SBR3, the acetate, ammonium, and orthophosphate were released at median

341 concentrations of 43 (min = 17; 1<sup>st</sup>-3<sup>rd</sup> quartile = 28-62)  $\text{mg COD L}_{\text{Eff}}^{-1}$ , 10 (2; 8-13)  $\text{mg N-}$

342  $\text{NH}_4^+ \text{ L}_{\text{Eff}}^{-1}$ , and 2.0 (0.4; 1.7-2.9)  $\text{mg P-PO}_4^{3-} \text{ L}_{\text{Eff}}^{-1}$ , *i.e.*, close to European discharge criteria.

343

344 >> Figure 2

345

346 Thus, the average apparent COD:N:P assimilation ratio evolved from 100:7.5:0.12 in the batch

347 to 100:9.2:1.2 (SBR1-2) under COD-limitation and 100:6.7:0.9 (SBR3) under non-COD-

348 limitation. Across and beyond the experimental period, the intrinsic kinetics and stoichiometry

349 of the PNSB-enriched biomass ranged with a biomass specific maximum growth rate ( $\mu_{\text{max}}$ ) of

350  $0.96\text{-}2.16 \text{ d}^{-1}$  and a maximum yield of biomass production on substrate ( $Y_{\text{X}/\text{COD},\text{max}}$ ) of 0.21-

351  $0.74 \text{ g VSS g}^{-1} \text{ CODs}$ , respectively. This related to a yield value of 0.34-1.19  $\text{g CODx g}^{-1} \text{ CODs}$

352 when using a theoretical elemental composition of  $\text{C}_1\text{H}_{1.8}\text{O}_{0.38}\text{N}_{0.18}$  ( $1.607 \text{ g CODx g}^{-1} \text{ VSS}$ )

353 for purple phototrophic bacteria (Puyol et al., 2017a). The maximum biomass specific

354 consumption of acetate ( $q_{\text{COD},\text{max}}$ ) ranged from 0.03-0.78  $\text{kg CODs h}^{-1} \text{ kg}^{-1} \text{ VSS}$ . These

355 measurements were performed directly during SBR cycles at the actual concentration of the

356 biomass present in the system. More accurate measurements and derivation of these



357 physiological parameters can be performed at diluted initial concentrations of PNSB biomass  
358 to prevent nutrient and light limitations during batch tests.

359

360 >> Table 2

361

### 362 3.1.4 Kinetic and stoichiometric parameters of microbial growth of the PNSB mixed culture

363 The maximum biomass specific rate of substrate consumption ( $q_{S,max}$ ), the yield of biomass  
364 growth of substrate consumption ( $Y_{X/S}$ ) and the maximum biomass specific growth rate ( $\mu_{max}$ )  
365 were obtained by parameter fit to batch evolutions of acetate and biomass during selected  
366 reaction phases of the SBRs (Table 3). Under the conditions of the initial batch and of SBR1  
367 (*i.e.*, long HRT of 48 h, low OLR of  $0.215 \text{ kg COD d}^{-1} \text{ m}^{-3}$ , very low biomass concentration of  
368  $0.1 \text{ g VSS L}^{-1}$ , and low SRT of 1.5 d), the highly-enriched PNSB biomass displayed a high  
369  $q_{S,max}$  between  $5.8\text{-}13.7 \text{ g COD}_S \text{ d}^{-1} \text{ g}^{-1} \text{ VSS}$  on which it maximized its growth rate:  $\mu_{max}$  ( $2.16\text{-}$   
370  $3.36 \text{ d}^{-1}$ ) was substantial, ranging between values reported in literature for mixed cultures and  
371 pure cultures of PNSB. The biomass thus developed at a relatively low yield  $Y_{X/S, max}$  ( $0.23\text{-}$   
372  $0.39 \text{ g VSS g}^{-1} \text{ COD}_S$ ). The maintenance rate ( $m_s$ ) was estimated to  $0.72 \text{ g COD}_S \text{ d}^{-1} \text{ g}^{-1} \text{ VSS}$ .  
373 Under the conditions of SBR2 and SBR3 (*i.e.*, 3-times lower HRTs, 3 to 6-times higher OLRs,  
374 16 to 30-times higher biomass concentrations, and 5 to 7-times longer SRTs), the biomass  
375 consumed acetate at a 3 to 8-fold lower  $q_{S,max}$  ( $1.8\text{-}2.2 \text{ g COD}_S \text{ d}^{-1} \text{ g}^{-1} \text{ VSS}$ ). The maximum  
376 growth rate and yield values could not be extracted from the data collected from the reactions  
377 phases at high biomass concentration (low sensitivity of absorbance and VSS measurements to  
378 detect changes). More accurate estimates are obtained with batch tests conducted with a diluted  
379 concentration of biomass.

380

381 >> Table 3

382

### 383 **3.2 SBR operations enhanced the settling ability and accumulation of the PNSB biomass**

384 The settling ability of the PNSB biomass increased across enrichment SBR operations, leading  
385 to substantial accumulation of biomass in the system from 0.1 (SBR1) to 1.6 (SBR2) to 3.0  
386 (SBR3) g VSS L<sup>-1</sup> as median values (Figure 2.C-D). The enhancement of the settling ability  
387 was measured by comparing these biomass concentrations present in the mixed liquor at the  
388 end of the reaction phase with the concentrations in the effluent after the settling phase which  
389 was for all SBRs as low as 0.13-0.15 g VSS L<sub>Eff</sub><sup>-1</sup> (Figure 2.C-D). The fraction of settled  
390 biomass increased across SBR1 from 12% to 53% of the VSS present in the mixed liquors at  
391 the end of reaction phases, reached 96% by end of SBR2, and remained high at 97±3% over  
392 SBR3 (Figure 2.C). The total rates of biomass accumulation calculated over the full settling  
393 period of 3 h increased from 0.02±0.01 (SBR1) to 0.69±0.46 (SBR2) and 1.30±0.45 (SBR3) g  
394 VSS h<sup>-1</sup>, or from 0.02±0.01 to 0.46±0.31 and 0.87±0.30 kg VSS h<sup>-1</sup> m<sup>-3</sup>, respectively, when  
395 translated into volumetric rates. At the beginning of SBR1, the full 3 h period was required to  
396 settle the suspended biomass. At the end of SBR3, most of the 5.9 g VSS of biomass that  
397 aggregated and accumulated in the system settled in about 10 min (*i.e.*, 35 gVSS h<sup>-1</sup> or 24 kg  
398 VSS h<sup>-1</sup> m<sup>-3</sup> effectively). This high settling rate obtained on SBR3 corresponds to a  
399 sedimentation G-flux of solids of 4.7 kg h<sup>-1</sup> m<sup>-2</sup>. This displayed the well-settling property of the  
400 aggregated PNSB biomass. It underlined potential for considerably shortening the settling  
401 phase and SBR cycle length in order to increase the daily loading of the system.

402

403 The fraction of VSS in the TSS remained relatively high with 85% (SBR1) to 93% (SBR2) to  
404 80% (SBR3) as median values, *i.e.*, corresponding to a fraction of inorganic suspended solids  
405 (ISS) between 7-20%. During SBR3 a period at lower VSS fraction with values below 60% and  
406 higher ISS fraction (>40%) was detected between days 97-117, underlying potential

407 accumulation of inorganics, *e.g.*, as intracellular polyphosphate (not measured), during nutrient  
408 assimilation in the biomass. Taking into account the P-uptake (average = 9, max = 13 mg P-  
409  $\text{PO}_4^{3-}$  cycle<sup>-1</sup>), biomass production of 90 mg VSS cycle<sup>-1</sup> (using the measured yield of  $0.23 \pm 0.02$   
410 g VSS g<sup>-1</sup> CODs) and VSS fraction of 80-90%, the average and maximum P-content of the cell  
411 were calculated to 8 and 14% of the cell dry weight which can underlie intracellular storage of  
412 polyphosphate to some extent.

413

414 The SRT was let to increase freely, without controlled purge of biomass, as a result of the  
415 enhancement of settling properties of the biomass: it rose from 2 d in SBR1 to 7 d in SBR2 and  
416 11 d in SBR3 as median values (Figure 2.D). Strategies can be tested to control the SRT at  
417 specific values on the range between, *e.g.*, 3-10 days, depending on nutrient capture and  
418 biomass production targets.

419

420

### 421 **3.3 Microscopy images displayed an increasing size of compact granular bioaggregates**

422 The PNSB enrichment process could be easily be tracked visually with the gradual increase in  
423 the purple color intensity in the bioreactor (Figure 3.A-D).

424

425 After inoculation with flocculent activated sludge, phase-contrast microscopy imaging revealed  
426 the presence of dense aggregates already in SBR1 formed by the PNSB biomass (Figure 3.E-  
427 G). Some cells clustered in flower-shaped aggregates, in a way comparable to the typical  
428 morphotype of *Rhodospseudomonas*. Other rod-shaped cells were present, putatively belonging  
429 to *Rhodobacter* and *Blastochloris* genera. The size of the aggregates increased from 50 to 150  
430  $\mu\text{m}$  during the operational time along with the better settling abilities of the biomass.

431

432 **3.4 Wavelength scans highlighted the enrichment of carotenoid and bacteriochlorophyll**  
433 **pigments in the biomass and a shift in PNSB populations**

434 Carotenoids and bacteriochlorophylls, and their increase along the enrichment of the PNSB  
435 biomass, were detected by the presence of absorbance peaks at wavelengths between 450-500  
436 nm and between 800-900 nm. The wavelength scan data presented in Figure 3.H are normalized  
437 by the biomass concentrations, expressed as absorbance units at 660 nm. Peaks at 800 nm and  
438 850 nm were already present at the end of the initial batch phase, and persisted during SBR1.  
439 At the end of SBR2, the absorbance peaks shifted to higher wavelengths of 805 nm and 865  
440 nm. During SBR3, another peak was detected at 1000 nm that is characteristic for the genus  
441 *Blastochloris*. This suggested a shift in predominant microbial populations harbouring different  
442 types of pigments in the PNSB guild across the mixed-culture enrichment process.

443  
444 >> Figure 3

445  
446 **3.5 Amplicon sequencing revealed selection shifts from *Rhodobacter* to *Rhodopseudo-***  
447 ***monas* and *Blastochloris* genera within the guild of PNSB**

448 The composition of the bacterial community of the mixed culture and underlying shifts in  
449 predominant populations were analysed by V3-V4 16S rRNA gene amplicon sequencing. The  
450 times series of PNSB populations are displayed in Figure 4. The detailed times series of the full  
451 set of identified genera in the sequencing dataset is given in Supplementary material 5.

452  
453 Across the experimental period, a rapid initial selection for a low number of predominant  
454 organisms occurred under the conditions of the first batch (acetate-based synthetic feed, non-  
455 limiting IR irradiance), prior to establishment of a more diverse community along SBR cycles.

456

457 The BNR activated sludge inoculum presented a diversity of genera, with *Rhodobacter* as the  
458 main PNSB detected at 5% of the sequencing read counts. The typical populations of the BNR  
459 sludge like ammonium oxidizer (*Nitrosomonas*), nitrite oxidizer (*Nitrospira*), denitrifier  
460 (*Zoogloea*), polyphosphate- (“*Candidatus Accumulibacter*”) and glycogen-accumulating (“*Ca.*  
461 *Competibacter*”) organisms got rapidly outcompeted right after start-up of the first batch under  
462 PNSB-selective conditions (Supplementary material 5).

463

464 At the end of the 40-h batch phase, *Rhodobacter* reached a relative abundance of 52%. At the  
465 end of the first cycle of SBR1, a high-grade enrichment of 90% of *Rhodobacter* was obtained.  
466 Around the 10<sup>th</sup> cycle of SBR1 (10 days), the genus *Rhodopseudomonas* got enriched at 15%,  
467 and reached 50% at the end of the 23<sup>rd</sup> cycle (23 days after inoculum). The compositions of the  
468 communities of the mixed liquor and of the biofilm that developed on the walls of the reactor  
469 during the 13<sup>th</sup> cycle revealed that *Rhodopseudomonas* (55%) was outcompeting *Rhodobacter*  
470 (5%) in the biofilm, while *Rhodobacter* (60%) was more enriched than *Rhodopseudomonas*  
471 (10%) in the mixed liquor. Then, *Rhodobacter* decreased constantly from cycle to cycle, while  
472 *Rhodopseudomonas* progressively took the lead in the flocculent biomass as well.

473

474 After 18 cycles of SBR2 (*i.e.*, 4.5 and 22.5 days from the starts of SBR2 and SBR1,  
475 respectively), *Rhodopseudomonas* became dominant (70%), outcompeting *Rhodobacter* (17%)  
476 in the enrichment culture. Interestingly, after 20 days of SBR2, the genus *Blastochloris*, also an  
477 affiliate of the PNSB guild, got selected, while the relative abundance of *Rhodopseudomonas*  
478 decreased to 60% at the end of SBR2. In SBR3, *Blastochloris* reached 10% of the bacterial  
479 community dataset.

480

481 >> Figure 4

## 482 **4 Discussion**

483

### 484 **4.1 A high-grade enrichment of a concentrated, well-settling PNSB biomass was** 485 **obtained under SBR regime**

486 The enrichment of PNSB has often been successful, while most PNSB mixed cultures reported  
487 so far have mainly been in membrane systems (Hülsemann et al., 2016). Here, we successfully  
488 enriched a mixed culture of PNSB out of activated sludge under traditional SBR regime in a  
489 stirred-tank system without the use of a membrane module to separate the biomass and the bulk  
490 liquid phase. This went by using the natural propensity of PNSB to form biofilms and  
491 bioaggregates. SBR regimes result in substrate gradients across reactor operation from high  
492 concentrations at the beginning of the cycle to low residual concentrations at the end. Such  
493 substrate gradients are known to promote the bioaggregation of microorganisms (Aqeel et al.,  
494 2019; Pronk et al., 2015; Winkler et al., 2018).

495

496 Promotion of bioaggregation of PNSB is key for a good S/L separation and accumulation of  
497 biomass in the system. One important outcome of this study highlighted that aggregation of  
498 PNSB can be stimulated under SBR regime to intensify the volumetric conversions and to  
499 facilitate downstream processing. After inoculation at 0.1 g VSS L<sup>-1</sup>, a high concentration of a  
500 PNSB-enriched biomass of up to a maximum of 4.0 g VSS L<sup>-1</sup> was obtained in SBR3. The good  
501 settling ability of the PNSB biomass obtained under this regime resulted in the emission of less  
502 than 5% of the mixed liquor biomass in the effluent of SBR3, as low as 0.1 g VSS L<sup>-1</sup>.  
503 Interestingly, Driessens et al. (1987) have early reported the flocculation and good  
504 sedimentation (G-flux of 7-9 kg h<sup>-1</sup> m<sup>-2</sup> comparable to well-flocculated activated sludge) of  
505 *Rhodobacter capsulatus* in an upflow continuous photobioreactor operated under loading rates  
506 of 2.5-5.0 kg C d<sup>-1</sup> m<sup>-3</sup> (as calcium lactate; *i.e.*, 6.7-13.3 kg COD d<sup>-1</sup> m<sup>-3</sup>) and 0.5-1.0 kg N d<sup>-1</sup>

507  $\text{m}^{-3}$  (as ammonium) with 87% C and N assimilation in the biomass (3.3-4.2 g VSS  $\text{L}^{-1}$ ). The  
508 PNSB-enriched biomass during SBR3 displayed a high sedimentation G-flux of 4.7  $\text{kg h}^{-1} \text{m}^{-2}$   
509 relatively close to the values reached by Driessens et al. (1987) under highly concentrated  
510 loading rates 5 to 10-fold higher than used here (max. 1.3  $\text{kg COD d}^{-1} \text{m}^{-3}$  in SBR3).  
511 Collectively, this comparison sustains that PNSB can be aggregated for a higher accumulation  
512 and retention of biomass to intensify nutrient conversions.

513

514 In the PNSB mixed culture, the HRT was initially set high to 48 h (*i.e.*, 1 cycle  $\text{d}^{-1}$  at a volume  
515 exchange ratio of 50%) to maintain biomass during start-up, prior to decreasing it to 16 h (3  
516 cycles  $\text{d}^{-1}$ ) from SBR2 onward. This value was in the range of the HRTs of 8-24 h that have  
517 been used in the operation of continuous photo anaerobic membrane bioreactor (PAnMBR) to  
518 enrich for purple phototrophic bacteria (PPB) at bench (Hülßen et al., 2016). It was also in the  
519 range of traditional SBRs operated with conventional activated sludge (Mace and Mata-  
520 Alvarez, 2002). An operation at 4 cycles  $\text{d}^{-1}$  may be foreseen. Decreasing the settling phase  
521 length would lead to selectively retain the biomass fraction with higher settling property, with  
522 granulation potentialities. This is a typical approach to form a granular sludge out of flocculent  
523 activated sludge (de Kreuk and van Loosdrecht, 2006; Lochmatter and Holliger, 2014; Winkler  
524 et al., 2018).

525

526 The settling ability increased along the SBR operation, with a settled biomass fraction raising  
527 from 12% (SBR1) to 97% (SBR2-3). Amplicon sequencing revealed that the settled biomass  
528 accounted for a 3-fold higher relative abundance of PNSB (80% as sum of *Rhodobacter*,  
529 *Rhodopseudomonas*, and *Blastochloris*) than the non-settled biomass (25%) (Figure 4).  
530 Together with the phase-contrast microscopy measurements, this highlighted that PNSB are  
531 capable of forming bioaggregates with good settling properties. Such increased settling ability

532 links to a more efficient separation of the PNSB biomass from the treated bulk liquid, thus  
533 facilitating the downstream processing to recover and valorize the PNSB biomass rich in  
534 nutrients for biorefinery purposes.

535

#### 536 **4.2 A high, simultaneous removal of C-N-P nutrients was achieved by the PNSB biomass**

537 High performances of organic matter (96% COD removal at a volumetric rate of 1.1 kg COD  
538  $\text{d}^{-1} \text{m}^{-3}$ ), ammonium (77% N-removal at 113 g N  $\text{d}^{-1} \text{m}^{-3}$ ), and orthophosphate (73% P-removal  
539 at 15 g P  $\text{d}^{-1} \text{m}^{-3}$ ) removal were obtained under operation with a single anaerobic reaction phase  
540 using the PNSB process. Conventionally, a sequence of anaerobic, anoxic, and aerobic  
541 conditions is needed for full BNR in activated sludge or granular sludge (Barnard and Abraham,  
542 2006; de Kreuk et al., 2005). The main difference relies that with PNSB single organisms can  
543 remove all nutrients by assimilation into the biomass by making use of photonic energy. BNR  
544 activated sludges make use of different microbial guilds of nitrifiers, denitrifiers,  
545 polyphosphate- and glycogen-accumulating organisms among others to remove all nutrients  
546 biologically. In activated sludge or granular sludge SBRs, the different redox conditions should  
547 be alternated to this end. Hence, this PNSB SBR process is a very interesting compact  
548 alternative to conventional BNR systems, that enables an enhanced removal of all nutrients in  
549 a single reaction phase by managing one single predominant microbial guild, thus simplifying  
550 considerably the microbial resource management.

551

552 With the PNSB biomass, the SBR process becomes simpler in terms of sequencing operation  
553 by feeding, anaerobic reaction, settling, and withdrawal. In practice, a fill/draw phase can be  
554 envisioned in function of the settling properties of the PNSB biomass. This can result in a SBR  
555 system operated by alternation of fil/draw and reaction phases only. Energy-wise, aeration is  
556 not needed in a PNSB process, resulting in possible electricity savings. In the case of sunlight



557 use, electricity savings will be substantial. The tank will have to be equipped with light filters  
558 to supply IR light and select for PNSB as predominant phototrophs in the mixed culture. In the  
559 case of ‘artificial’ supply of IR light, *e.g.*, with LEDs, the process economics will have to be  
560 balanced with the electrical power needed to provide the irradiance needed to run the process.  
561 A PNSB-based SBR process can become efficient by supplying IR light with LEDs immersed  
562 in the reactor tank or, *e.g.*, with floating carriers that can emit light under radiowaving Biofilm  
563 formation on light tubes will necessitate periodical cleaning to remediate shading, such as  
564 conventionally done for the maintenance of sensors used for process monitoring and control.  
565 The irradiance of  $375 \text{ W m}^{-2}$  applied in this bench-scale photoSBR is high versus of practical  
566 operation window. Sunny regions of Europe are typically characterized by an annual average  
567 sunlight irradiance of  $150 \text{ W m}^{-2}$  (Posten, 2009). Nonetheless, light can be provided  
568 synthetically in photobioreactors using, *e.g.*, immersed LED devices. The aim of this study was  
569 not to optimize the reactor design. Definitely, thermoeconomical analysis will have to be  
570 conducted to determine the optimum irradiance to supply.

571  
572 This is analogical to the comparison of stirring performances in bench-scale reactors versus  
573 full-scale systems. There is definitely room to study PNSB processes at different illumination  
574 intensities and their impact on the system responses such as enrichment grades, biomass  
575 concentrations, aggregation levels, and nutrient removal performances. Recent studies  
576 published on purple phototrophic bacteria involved irradiances of *ca.*  $50 \text{ W m}^{-2}$  (Hülse et al.,  
577 2016; Puyol et al., 2017a) which is about 8-times lower than the one used here at bench.  
578 However, no study has yet come with clear information on irradiance cutoffs and light patterns  
579 related to the economics of pilot and full-scale PNSB processes.

580

581 The volumetric removal rate of up to 1.1 kg COD d<sup>-1</sup> m<sup>-3</sup> achieved under the operation of SBR3  
582 is comparable to the ranges of 0.8-2.5 kg COD d<sup>-1</sup> m<sup>-3</sup> reported for the PAnMBR (Hülse et al.,  
583 2016), 0.2-1.4 kg COD d<sup>-1</sup> m<sup>-3</sup> for a continuous-flow stirred-tank reactor without separation of  
584 PNSB biomass (Alloul et al., 2019), and 1.2-3.2 kg COD d<sup>-1</sup> m<sup>-3</sup> for conventional BNR activated  
585 sludge processes (Tchobanoglous *et al.*, 2003). It was nonetheless higher compared to aeration  
586 reactors, anaerobic ponds, and oxidation ditches (Tchobanoglous *et al.*, 2003). Further  
587 enhancement of the COD loading rate and removal rate will be achieved by decreasing the SBR  
588 cycle time.

589  
590 The difference in COD:N:P assimilation ratio between SBR1-2 (100:9.2:1.2 m/m/m) and SBR3  
591 (100:6.7:0.9) resulted from the doubling of the acetate load in the influent. These COD:N:P  
592 assimilation ratios were in the range of ratios of 100:5.1-7.1:0.9-1.8 that have been  
593 characterized during growth of purple phototrophic bacteria (Hülse *et al.*, 2016a; Puyol *et al.*,  
594 2017b). As comparison basis, a COD-N-P assimilation ratio of 100:5:1 is theoretically used for  
595 activated sludge (Henze et al., 2000).

596  
597 The oscillating periods of higher ISS content (>40%) in the PNSB biomass during SBR3 can  
598 underlie an interesting potential accumulation of inorganics in the biomass, *e.g.*, as intracellular  
599 polyphosphate. Similar ISS fractions of 30-40% have been widely detected in biomasses  
600 engineered for an enhanced biological phosphorus removal (EBPR) (Weissbrodt et al., 2014a).  
601 It is interesting here to mention that the model polyphosphate-accumulating organism (PAO)  
602 “*Candidatus Accumulibacter*” belongs to the microbially diverse betaproteobacterial family of  
603 *Rhodocyclaceae* (Weissbrodt et al., 2014b), thus semantically sharing the prefix “Rhodo-” with  
604 many of PNSB genera. “*Ca. Accumulibacter*” is taxonomically close to the genus *Rhodocyclus*  
605 (Hesselmann et al., 1999) which notably comprises the PNSB species *Rhodocyclus purpureus*.

606 Although early unsuccessful testing of growth of “*Ca. Accumulibacter*” under light in the late  
607 90’s by these authors indicating that “*Ca. Accumulibacter*” may have lost phototrophic  
608 machinery by evolution, it is worth noting that PNSB populations and “*Ca. Accumulibacter*”  
609 can share functional traits for polyphosphate accumulation. PNSB have been shown to store  
610 phosphorus to some extent (15% of cell mass) (Liang et al., 2010). Ecophysiological elucidation  
611 of PNSB populations for phosphorus removal is of high scientific and technological interests.

612

### 613 **4.3 Acetate and wavelength gradients underlie microbial selection in the PNSB guild**

614 Spectrophotometric measurements of the biomass by wavelength scans from 300 to 900 nm  
615 revealed absorbance peaks characteristics for carotenoids and bacteriochlorophylls in PNSB.  
616 Peaks at 805 and 850 nm are typical for bacteriochlorophylls detected *in vivo* from cells of  
617 *Rhodopseudomonas capsulata* (Madigan and Gest, 1979), whereas a peak around 865 nm is  
618 typical for *Rhodobacter* (Zubova et al., 2005). These peaks were detected across the whole  
619 experimental period, indicating the presence and selection of PNSB organisms in the process.  
620 Pigments are excellent biomarkers of phototrophic populations, and provide specificity to  
621 distinguish between them (Stomp et al., 2007). Wavelength scan analyses are therefore very  
622 efficient for a rapid measurement (at min level) of the selection of PNSB.

623

624 The 16S rRNA gene amplicon sequencing analysis provided insights at higher resolution on the  
625 composition of the PNSB guild and underlying selection phenomena. Amplicon sequencing  
626 revealed a consistent enrichment of PNSB after already the first 40 h of batch. The initial  
627 enrichment of *Rhodobacter* followed by selection of *Rhodopseudomonas* and then  
628 *Blastochloris* can be explained by competition phenomena across substrate and wavelength  
629 gradients between these genera inside the guild of PNSB.

630

631 Okubo & Hiraishi (2007) have reported a preferential selection of *Rhodobacter* under high  
632 acetate concentration (5-20 mmol L<sup>-1</sup>, *i.e.*, 320-1280 mg CODs L<sup>-1</sup>) due to its low affinity for  
633 acetate, while *Rhodopseudomonas* was enriched at lower concentrations (0.5 – 1 mmol L<sup>-1</sup>, *i.e.*,  
634 32-64 mg CODs L<sup>-1</sup>). The initial 40-h batch was fully loaded with acetate across the whole  
635 reaction period, making this condition favourable to select for *Rhodobacter*. Instead,  
636 *Rhodopseudomonas* harbours a higher affinity (*i.e.*, lower affinity constant K<sub>s</sub> of 0.11 mM for  
637 *Rhodopseudomonas* vs 0.23 mM for *Rhodobacter*) (Okubo and Hiraishi, 2007) for acetate,  
638 enabling this population to grow more efficiently than *Rhodobacter* under acetate-limited  
639 conditions. During SBR1 and SBR2, the carbon source became progressively depleted after 1.5  
640 h of reaction phase, leaving other 2.5 h of starvation period at low residual acetate  
641 concentration. This provided *Rhodopseudomonas* with a competitive advantage for growth.

642  
643 The competition between *Rhodobacter* and *Rhodopseudomonas* may also be governed by their  
644 growth rate and thus the SRT in the system. Populations of *Rhodobacter* have displayed a higher  
645 maximum growth rate (1.8-2.2 d<sup>-1</sup> in an enrichment and 2.3-3.8 d<sup>-1</sup> with isolates) about 2.6  
646 times faster than *Rhodopseudomonas* on VFA (Alloul et al., 2019). Batch regimes primarily  
647 select on growth rate: organisms deploy their maximum growth rate across most of a batch  
648 period during which substrate concentrations are mostly not limiting (Rombouts et al., 2019).  
649 The organism with the highest growth rate that can be activated under the actual operation  
650 conditions is therefore preferentially selected. This underlay the selection for *Rhodobacter* first  
651 prior to the progressive establishment of *Rhodopseudomonas* along the progressive increase in  
652 SRT.

653  
654 The genus *Blastochloris*, which appeared during SBR3, harbours bacteriochlorophyll b (BChl b)  
655 instead of BChl a in *Rhodobacter* and *Rhodopseudomonas*. BChl b absorbs lower photonic

656 energy at higher wavelengths (1020-1030 nm) (Hoogewerf et al., 2003) and can, therefore,  
657 interestingly survive at higher cell densities (here, around 1.5 g VSS L<sup>-1</sup>) with lower light  
658 penetration in the bulk liquid. Absorbance of the incident IR light increased across reactor  
659 operation with the development of a biofilm dominated by *Rhodopseudomonas* on the reactor  
660 wall and with a high concentration of PNSB biomass of up to 3.8 g VSS L<sup>-1</sup> that accumulated  
661 in the reactor. According to the Beer-Lambert law, the accumulation of *Rhodobacter* and  
662 *Rhodopseudomonas* in the reactor and wall biofilm resulted in the absorbance of the higher-  
663 energy wavelengths in the 800-850 nm range of the IR light supplied, thus acting as wavelength  
664 filter. This possibly led the remaining lower-energy IR light at wavelengths above 850 nm  
665 passing further through the mixed liquor. The conjunction of the relatively high irradiance of  
666 375 W m<sup>-2</sup> and high SRT of 11 d were likely favorable for *Blastochloris* selection. Physiological  
667 characterizations of this genus is needed in order to better predict its competition with other  
668 members of the diverse PNSB guild like *Rhodobacter* and *Rhodopseudomonas* among others.  
669  
670 Overall, substrate gradients, light gradients, biofilm formation, and bioaggregation were  
671 identified as factors that triggered population selection and dynamics in the PNSB enrichment.  
672 Different lineages therefore act *de concert* inside the guild of PNSB, providing metabolic  
673 redundancy and process resilience in the case of regime shifts in the process.

674

#### 675 **4.4 PNSB mixed cultures biotechnologies: from bench toward process development**

676 The development of a lab-scale SBR system enriched for PNSB opens the doors for a possible  
677 upscaling of the process. A high nutrient capture was coupled with the production of a PNSB-  
678 rich biomass. Such biomass can be valorized for, *e.g.*, proteins or PHAs productions (Alloul et  
679 al., 2018; Honda et al., 2006; Hülsen et al., 2018). The high settling ability of the biomass allows  
680 an easier solid-liquid separation of the latter from the treated water either in a compact external

681 settler or directly in the SBR tank. This provides a definite downstream processing advantage  
682 over suspended biomass. It also overcomes the use of membrane filtration modules. The SBR  
683 regime resulted in the efficient aggregation of PNSB, underlying an enhanced settling ability  
684 and accumulation of biomass in the system. The SRT is an important process variable to control  
685 toward a stable bioprocess (Morgenroth and Wilderer, 1999). This becomes even more  
686 important in the perspective of harnessing the phosphorus removal capability of the PNSB  
687 biomass: cells saturated with phosphorus have to be effectively removed from the system such  
688 as conventionally performed by purge of excess sludge to maintain robust activated sludge or  
689 granular sludge processes operated for EBPR (Barnard and Abraham, 2006; Weissbrodt et al.,  
690 2013). The growth rate and affinity for the substrate are further important parameter to manage  
691 the selection of PNSB populations in either batch or continuous-flow reactor regimes,  
692 respectively. Similarly, light irradiance is a key operational variable since it constitutes the  
693 primary energy source for PNSB. Light penetration and distribution are directly linked to the  
694 reactor geometry. In surface water ecosystems, IR light photons are typically consumed over  
695 the first 30 cm depth. Following the Beer-Lambert law, the absorbance of light will substantially  
696 increase with the biomass concentration. Shallow reactor systems can be opportune. SBR  
697 regimes can easily be transferred from stirred-tank to any reactor design, like raceway systems  
698 (or also known as carrousel plants) currently under investigation for green and purple  
699 phototrophic mixed-culture processes (Alloul et al., submitted). The application of substrate  
700 gradients via SBR or plug-flow reactor configurations can foster biomass aggregation to sustain  
701 efficient S/L separation for biomass recovery on top of nutrient capture.

## 702 5 Conclusions

703

704 We investigated at bench the possibility to establish a mixed-culture PNSB process for nutrient  
705 capture from wastewater in a photobioreactor operated as a traditional simple and flexible  
706 stirred-tank SBR. This work led to the following three main conclusions:

- 707 1. SBR process conditions stimulated aggregation and accumulation (as high as 3.8 g VSS  
708 L<sup>-1</sup>) of a PNSB-enriched mixed culture in a fast-settling biomass that removed all  
709 nutrients biologically in a single reaction stage. The formation of compact aggregates  
710 facilitated S/L separation.
- 711 2. Nutrient removal was substantial by assimilation in the biomass, reaching  
712 simultaneously 96% of organic matter at 1.1 kg COD d<sup>-1</sup> m<sup>-3</sup>, 77% of ammonium at 113  
713 g N d<sup>-1</sup> m<sup>-3</sup>, and 73% of orthophosphate at 15 g P d<sup>-1</sup> m<sup>-3</sup>, *i.e.*, comparable to BNR  
714 activated sludge processes. Under non-COD-limiting conditions, the process reached  
715 the nutrient discharge limits set by the European Union.
- 716 3. The PNSB guild accounted for as high as 90% of the bacterial community of the sludge  
717 (*i.e.*, amplicon sequencing dataset), enabling a simple management of the microbial  
718 resource. A sequential selection between the genera *Rhodobacter*, *Rhodopseudomonas*,  
719 and *Blastochloris* was detected inside PNSB, allowing for functional redundancy in the  
720 microbiome. Next investigations should elucidate competition phenomena along  
721 growth rates, substrate affinities, and wavelength gradients across the mixed liquor.

722 For engineering practice, process analysis should cover the technological and economical  
723 aspects related to light supply in the bioreactor. Besides wastewater treatment, the value of the  
724 PNSB-based mixed-culture SBR process will reside in opportunities for water and resource  
725 recovery by valorization of the retained, concentrated, and nutrient-rich PNSB biomass.

## 726 **Supplementary material**

- 727 • Supplementary material 1: Symbols and formula
- 728 • Supplementary material 2: Correlation between VSS and absorbance measurements
- 729 • Supplementary material 3: Nutrient and biomass concentrations and compositions
- 730 • Supplementary material 4: Parameter fit in Aquasim along 40-h batch and SBRs 1-3
- 731 • Supplementary material 5: V3-V4 16S rRNA gene amplicon sequencing time series

732

## 733 **Declaration of interest statement**

734

735 The authors declare no conflict of interest.

736

## 737 **Acknowledgements**

738

739 This study was financed by the tenure-track start-up grant of the Department of Biotechnology  
740 of the Faculty of Applied Sciences of the TU Delft (David Weissbrodt, PI). Abbas Alloul was  
741 supported as doctoral candidate from the Research Foundation Flanders (FWO-Vlaanderen;  
742 strategic basic research; 1S23018N). We acknowledge the technical assistance of Udo van  
743 Dongen, Rhody Broekman, and Zita van der Krogt, successively, with the reactor infrastructure  
744 in the fermentation facility, Dirk Geerts and Rob Keerste with SCADA, as well as Ben Abbas  
745 on molecular biology.

746

747 This manuscript will be deposited as pre-print in bioRxiv.

748



## 749 References

- 750 Alloul, A., Ganigué, R., Spiller, M., Meerburg, F., Cagnetta, C., Rabaey, K., Vlaeminck, S.E.,  
751 2018. Capture-Ferment-Upgrade: A Three-Step Approach for the Valorization of Sewage  
752 Organics as Commodities. *Environ. Sci. Technol.* 52, 6729–6742.  
753 <https://doi.org/10.1021/acs.est.7b05712>
- 754 Alloul, A., Wuyts, S., Lebeer, S., Vlaeminck, S.E., 2019. Volatile fatty acids impacting  
755 phototrophic growth kinetics of purple bacteria: Paving the way for protein production on  
756 fermented wastewater. *Water Res.* 152, 138–147.  
757 <https://doi.org/10.1016/j.watres.2018.12.025>
- 758 Almasi, A., Pescod, M.B., 1996. Wastewater treatment mechanisms in anoxic stabilization  
759 ponds. *Water Sci. Technol.* 33, 125–132. [https://doi.org/10.1016/0273-1223\(96\)00347-2](https://doi.org/10.1016/0273-1223(96)00347-2)
- 760 Aqeel, H., Weissbrodt, D.G., Cerruti, M., Wolfaardt, G.M., Wilén, B.-M., Liss, S.N., 2019.  
761 Drivers of bioaggregation from flocs to biofilms and granular sludge. *Environ. Sci. Water*  
762 *Res. Technol.* In press. <https://doi.org/10.1039/c9ew00450e>
- 763 Barnard, J.L., Abraham, K., 2006. Key features of successful BNR operation. *Water Sci.*  
764 *Technol.* 53, 1–9. <https://doi.org/10.2166/wst.2006.400>
- 765 Bryant, D.A., Frigaard, N.-U., 2006. Prokaryotic photosynthesis and phototrophy illuminated.  
766 *Trends Microbiol.* 14, 488–496. <https://doi.org/10.1016/j.tim.2006.09.001>
- 767 Carlozzi, P., Pushparaj, B., Degl'Innocenti, A., Capperucci, A., 2006. Growth characteristics  
768 of *Rhodospseudomonas palustris* cultured outdoors, in an underwater tubular  
769 photobioreactor, and investigation on photosynthetic efficiency. *Appl. Microbiol.*  
770 *Biotechnol.* <https://doi.org/10.1007/s00253-006-0550-z>
- 771 Chitapornpan, S., Chiemchaisri, C., Chiemchaisri, W., Honda, R., Yamamoto, K., 2012.  
772 Photosynthetic bacteria production from food processing wastewater in sequencing batch  
773 and membrane photo-bioreactors. *Water Sci. Technol.* 65, 504–512.  
774 <https://doi.org/10.2166/wst.2012.740>
- 775 de Kreuk, M.K., Heijnen, J.J., van Loosdrecht, M.C.M., 2005. Simultaneous COD, nitrogen,  
776 and phosphate removal by aerobic granular sludge. *Biotechnol. Bioeng.* 90, 761–769.  
777 <https://doi.org/10.1002/bit.20470>
- 778 de Kreuk, M.K., van Loosdrecht, M.C.M., 2006. Formation of aerobic granules with domestic  
779 sewage. *J. Environ. Eng.* 132, 694–697. [https://doi.org/10.1061/\(ASCE\)0733-9372\(2006\)132:6\(694\)](https://doi.org/10.1061/(ASCE)0733-9372(2006)132:6(694))
- 781 Driessens, K., Liessens, J., Masduki, S., Verstraete, W., Nelis, H., De Leenheer, A., 1987.  
782 Production of *Rhodobacter capsulatus* ATCC 23782 with short residence time in a  
783 continuous flow photobioreactor. *Process Biochem.* 22, 160–164.
- 784 Eroglu, N., Aslan, K., Gündüz, U., Yücel, M., Türker, L., 1999. Substrate consumption rates  
785 for hydrogen production by *Rhodobacter sphaeroides* in a column photobioreactor. *Prog.*  
786 *Ind. Microbiol.* 35, 103–113. [https://doi.org/10.1016/S0079-6352\(99\)80104-0](https://doi.org/10.1016/S0079-6352(99)80104-0)
- 787 EUR-Lex, 1991. Council Directive 91/271/EEC of 21 May 1991 concerning urban waste-water  
788 treatment. *Off. J. Eur. Communities.*
- 789 Fradinho, J.C., Domingos, J.M.B., Carvalho, G., Oehmen, A., Reis, M.A.M., 2013.  
790 Polyhydroxyalkanoates production by a mixed photosynthetic consortium of bacteria and  
791 algae. *Bioresour. Technol.* 132, 146–153. <https://doi.org/10.1016/j.biortech.2013.01.050>
- 792 Freedman, D., Koopman, B., Lincoln, E.P., 1983. Chemical and biological flocculation of  
793 purple sulphur bacteria in anaerobic lagoon effluent. *J. Agric. Eng. Res.* 28, 115–125.  
794 [https://doi.org/10.1016/0021-8634\(83\)90081-1](https://doi.org/10.1016/0021-8634(83)90081-1)
- 795 Frigaard, N.-U., 2016. Biotechnology of Anoxygenic Phototrophic Bacteria. *Adv. Biochem.*  
796 *Eng. Biotechnol.* 156, 139–154. [https://doi.org/10.1007/10\\_2015\\_5006](https://doi.org/10.1007/10_2015_5006)

- 797 Guest, J.S., Skerlos, S.J., Barnard, J.L., Beck, M.B., Daigger, G.T., Hilger, H., Jackson, S.J.,  
798 Karvazy, K., Kelly, L., Macpherson, L., Mihelcic, J.R., Pramanik, A., Raskin, L., Van  
799 Loosdrecht, M.C.M., Yeh, D., Love, N.G., 2009. A new planning and design paradigm to  
800 achieve sustainable resource recovery from wastewater. *Environ. Sci. Technol.* 43, 6126–  
801 6130. <https://doi.org/10.1021/es9010515>
- 802 Guimarães, L.B., Wagner, J., Akaboci, T.R.V., Daudt, G.C., Nielsen, P.H., van Loosdrecht,  
803 M.C.M., Weissbrodt, D.G., da Costa, R.H.R., 2018. Elucidating performance failures in  
804 use of granular sludge for nutrient removal from domestic wastewater in a warm coastal  
805 climate region. *Environ. Technol. (United Kingdom)* 1–33.  
806 <https://doi.org/10.1080/09593330.2018.1551938>
- 807 Heijnen, J.J., Kleerebezem, R., 2010. Bioenergetics of Microbial Growth, in: *Encyclopedia of*  
808 *Industrial Biotechnology*. John Wiley & Sons, Inc., Hoboken, NJ, USA, pp. 1–66.  
809 <https://doi.org/10.1002/9780470054581.eib084>
- 810 Henze, M., Gujer, W., Mino, T., van Loosdrecht, M.C.M., 2000. Activated sludge models  
811 ASM1, ASM2, ASM2d and ASM3. IWA Publishing, London.
- 812 Hesselmann, R.P., Werlen, C., Hahn, D., van der Meer, J.R., Zehnder, A.J., 1999. Enrichment,  
813 phylogenetic analysis and detection of a bacterium that performs enhanced biological  
814 phosphate removal in activated sludge. *Syst. Appl. Microbiol.* 22, 454–65.  
815 [https://doi.org/10.1016/S0723-2020\(99\)80055-1](https://doi.org/10.1016/S0723-2020(99)80055-1)
- 816 Honda, R., Fukushi, K., Yamamoto, K., 2006. Optimization of wastewater feeding for single-  
817 cell protein production in an anaerobic wastewater treatment process utilizing purple non-  
818 sulfur bacteria in mixed culture condition. *J. Biotechnol.* 125, 565–573.  
819 <https://doi.org/10.1016/j.jbiotec.2006.03.022>
- 820 Hoogewerf, G.J., Jung, D.O., Madigan, M.T., 2003. Evidence for limited species diversity of  
821 bacteriochlorophyll b-containing purple nonsulfur anoxygenic phototrophs in freshwater  
822 habitats. *FEMS Microbiol. Lett.* 218, 359–364. [https://doi.org/10.1016/S0378-1097\(02\)01195-3](https://doi.org/10.1016/S0378-1097(02)01195-3)
- 824 Hülsen, T., Barry, E.M., Lu, Y., Puyol, D., Keller, J., Batstone, D.J., 2016. Domestic  
825 wastewater treatment with purple phototrophic bacteria using a novel continuous photo  
826 anaerobic membrane bioreactor. *Water Res.* 100, 486–495.  
827 <https://doi.org/10.1016/j.watres.2016.04.061>
- 828 Hülsen, T., Batstone, D.J., Keller, J., 2014. Phototrophic bacteria for nutrient recovery from  
829 domestic wastewater. *Water Res.* 50, 18–26. <https://doi.org/10.1016/j.watres.2013.10.051>
- 830 Hülsen, T., Hsieh, K., Lu, Y., Tait, S., Batstone, D.J., 2018. Simultaneous treatment and single  
831 cell protein production from agri-industrial wastewaters using purple phototrophic bacteria  
832 or microalgae – A comparison. *Bioresour. Technol.* 254, 214–223.  
833 <https://doi.org/10.1016/j.biortech.2018.01.032>
- 834 Hustede, E., Steinbüchel, A., Schlegel, H.G., 1993. Relationship between the photoproduction  
835 of hydrogen and the accumulation of PHB in non-sulphur purple bacteria. *Appl. Microbiol.*  
836 *Biotechnol.* 39, 87–93. <https://doi.org/10.1007/BF00166854>
- 837 Imhoff, J.F., 2017. Diversity of anaerobic anoxygenic phototrophic purple bacteria, in: *Modern*  
838 *Topics in the Phototrophic Prokaryotes: Environmental and Applied Aspects*. pp. 47–85.  
839 [https://doi.org/10.1007/978-3-319-46261-5\\_2](https://doi.org/10.1007/978-3-319-46261-5_2)
- 840 Kaewsuk, J., Thorasampan, W., Thanuttamavong, M., Seo, G.T., 2010. Kinetic development  
841 and evaluation of membrane sequencing batch reactor (MSBR) with mixed cultures  
842 photosynthetic bacteria for dairy wastewater treatment. *J. Environ. Manage.* 91, 1161–  
843 1168. <https://doi.org/10.1016/j.jenvman.2010.01.012>
- 844 Lenz, R.W., Marchessault, R.H., 2005. Bacterial Polyesters: Biosynthesis, Biodegradable  
845 Plastics and Biotechnology. *Biomacromolecules* 6, 1–8.

- 846 <https://doi.org/10.1021/bm049700c>
- 847 Liang, C.-M., Hung, C.-H., Hsu, S.-C., Yeh, I.-C., 2010. Purple nonsulfur bacteria diversity in  
848 activated sludge and its potential phosphorus-accumulating ability under different  
849 cultivation conditions. *Appl. Microbiol. Biotechnol.* 86, 709–719.  
850 <https://doi.org/10.1007/s00253-009-2348-2>
- 851 Lochmatter, S., Holliger, C., 2014. Optimization of operation conditions for the startup of  
852 aerobic granular sludge reactors biologically removing carbon, nitrogen, and phosphorus.  
853 *Water Res.* 59, 58–70. <https://doi.org/10.1016/j.watres.2014.04.011>
- 854 Luongo, V., Ghimire, A., Frunzo, L., Fabbicino, M., d’Antonio, G., Pirozzi, F., Esposito, G.,  
855 2017. Photofermentative production of hydrogen and poly- $\beta$ -hydroxybutyrate from dark  
856 fermentation products. *Bioresour. Technol.* 228, 171–175.  
857 <https://doi.org/10.1016/j.biortech.2016.12.079>
- 858 Mace, S., Mata-Alvarez, J., 2002. Utilization of SBR technology for wastewater treatment: An  
859 overview. *Ind. Eng. Chem. Res.* 41, 5539–5553. <https://doi.org/10.1021/ie0201821>
- 860 Madigan, M.T., Gest, H., 1979. Growth of the photosynthetic bacterium *Rhodospseudomonas*  
861 *capsulata* chemoautotrophically in darkness with H<sub>2</sub> as the energy source. *J. Bacteriol.*  
862 137, 524–530.
- 863 Madigan, M.T., Jung, D.O., 2009. Chapter 1 An Overview of Purple Bacteria : Systematics ,  
864 Physiology , and Habitats, in: *The Purple Phototrophic Bacteria*. pp. 1–15.
- 865 McEwan, A.G., 1994. Photosynthetic electron transport and anaerobic metabolism in purple  
866 non-sulfur phototrophic bacteria. *Antonie Van Leeuwenhoek* 66, 151–164.
- 867 Morgenroth, E., Wilderer, P.A., 1999. Controlled biomass removal — The key parameter to  
868 achieve enhanced biological phosphorus removal in biofilm systems. *Water Sci. Technol.*  
869 39, 33–40. [https://doi.org/10.1016/S0273-1223\(99\)00147-X](https://doi.org/10.1016/S0273-1223(99)00147-X)
- 870 Morgenroth, E., Wilderer, P.A., 1998. Sequencing Batch Reactor Technology: Concepts,  
871 Design and Experiences (Abridged). *Water Environ. J.* 12, 314–320.
- 872 Nakajima, F., Kamiko, N., Yamamoto, K., 1997. Organic wastewater treatment without  
873 greenhouse gas emission by photosynthetic bacteria. *Water Sci. Technol.* 35, 285–291.  
874 [https://doi.org/10.1016/S0273-1223\(97\)00178-9](https://doi.org/10.1016/S0273-1223(97)00178-9)
- 875 Nandi, R., Sengupta, S., 1998. Microbial Production of Hydrogen: An Overview. *Crit. Rev.*  
876 *Microbiol.* 24, 61–84. <https://doi.org/10.1080/10408419891294181>
- 877 Okubo, Y., Hiraishi, A., 2007. Population dynamics and acetate utilization kinetics of two  
878 different species of phototrophic purple nonsulfur bacteria in a continuous co-culture  
879 System. *Microbes Env.* 22, 82–87.
- 880 Posten, C., 2009. Design principles of photo-bioreactors for cultivation of microalgae. *Eng.*  
881 *Life Sci.* 9, 165–177. <https://doi.org/10.1002/elsc.200900003>
- 882 Pronk, M., Abbas, B., Al-zuhairy, S.H.K., Kraan, R., Kleerebezem, R., van Loosdrecht,  
883 M.C.M., 2015. Effect and behaviour of different substrates in relation to the formation of  
884 aerobic granular sludge. *Appl. Microbiol. Biotechnol.* 99, 5257–5268.  
885 <https://doi.org/10.1007/s00253-014-6358-3>
- 886 Pulz O., 2001. Photobioreactors: production systems for phototrophic microorganisms. *Appl.*  
887 *Microbiol. Biotechnol.* 57, 287–293.
- 888 Puyol, D., Barry, E.M., Hülsen, T., Batstone, D.J., 2017a. A mechanistic model for anaerobic  
889 phototrophs in domestic wastewater applications: Photo-anaerobic model (PANM). *Water*  
890 *Res.* 116, 241–253. <https://doi.org/10.1016/j.watres.2017.03.022>
- 891 Puyol, D., Batstone, D.J., Hülsen, T., Astals, S., Peces, M., Krömer, J.O., 2017b. Resource  
892 recovery from wastewater by biological technologies: opportunities, challenges, and  
893 prospects. *Front. Microbiol.* 7, 1–23. <https://doi.org/10.3389/fmicb.2016.02106>
- 894 Reichert, P., 1994. Aquasim - A tool for simulation and data analysis of aquatic systems. *Water*

- 895 Sci. Technol. 30, 21–30. <https://doi.org/10.2166/wst.1994.0025>
- 896 Rombouts, J.L., Mos, G., Weissbrodt, D.G., Kleerebezem, R., Van Loosdrecht, M.C.M., 2019.
- 897 Diversity and metabolism of xylose and glucose fermenting microbial communities in
- 898 sequencing batch or continuous culturing. FEMS Microbiol. Ecol. 95.
- 899 <https://doi.org/10.1093/femsec/fiy233>
- 900 Stomp, M., Huisman, J., Stal, L.J., Matthijs, H.C.P., 2007. Colorful niches of phototrophic
- 901 microorganisms shaped by vibrations of the water molecule. ISME J. 1, 271–282.
- 902 <https://doi.org/10.1038/ismej.2007.59>
- 903 Stoppani, A. 0 M., Fuller, R.C., Calvin, A.M., 1955. Carbon dioxide fixation by
- 904 *Rhodospseudomonas capsulatus*. J. Bacteriol. 69, 491–501.
- 905 Takahashi, S., Tomita, J., Nishioka, K., Hisada, T., Nishijima, M., 2014. Development of a
- 906 prokaryotic universal primer for simultaneous analysis of Bacteria and Archaea using
- 907 next-generation sequencing. PLoS One 9. <https://doi.org/10.1371/journal.pone.0105592>
- 908 Tchobanoglous, G., Burton, F.L., Stensel, H.D., Metcalf & Eddy, I., 2003. Wastewater
- 909 engineering: treatment and reuse, 4th ed. / . ed, McGraw-Hill. McGraw-Hill, Boston SE -
- 910 xxviii, 1819 pages : illustrations ; 24 cm.
- 911 van der Star, W.R.L., Miclea, A.I., van Dongen, U.G.J.M., Muyzer, G., Picioreanu, C., van
- 912 Loosdrecht, M.C.M., 2008. The membrane bioreactor: A novel tool to grow anammox
- 913 bacteria as free cells. Biotechnol. Bioeng. <https://doi.org/10.1002/bit.21891>
- 914 van Niel, C.B., 1944. The culture, general physiology, morphology, and classification of the
- 915 non-sulfur purple and brown bacteria. Bacteriol. Rev. 8, 1–118.
- 916 Verstraete, W., Clauwaert, P., Vlaeminck, S.E., 2016. Used water and nutrients: Recovery
- 917 perspectives in a “*panta rhei*” context. Bioresour. Technol. 215, 199–208.
- 918 <https://doi.org/10.1016/j.biortech.2016.04.094>
- 919 Verstraete, W., Vlaeminck, S.E., 2011. ZeroWasteWater: Short-cycling of wastewater
- 920 resources for sustainable cities of the future. Int. J. Sustain. Dev. World Ecol.
- 921 <https://doi.org/10.1080/13504509.2011.570804>
- 922 Weissbrodt, D.G., Lochmatter, S., Ebrahimi, S., Rossi, P., Maillard, J., Holliger, C., 2012.
- 923 Bacterial Selection during the Formation of Early-Stage Aerobic Granules in Wastewater
- 924 Treatment Systems Operated Under Wash-Out Dynamics. Front. Microbiol. 3, 332.
- 925 <https://doi.org/10.3389/fmicb.2012.00332>
- 926 Weissbrodt, D.G., Maillard, J., Brovelli, A., Chabrelie, A., May, J., Holliger, C., 2014a.
- 927 Multilevel correlations in the biological phosphorus removal process: From bacterial
- 928 enrichment to conductivity-based metabolic batch tests and polyphosphatase assays.
- 929 Biotechnol. Bioeng. 111, 2421–2435. <https://doi.org/10.1002/bit.25320>
- 930 Weissbrodt, D.G., Schneiter, G.S., Fürbringer, J.-M., Holliger, C., 2013. Identification of
- 931 trigger factors selecting for polyphosphate- and glycogen-accumulating organisms in
- 932 aerobic granular sludge sequencing batch reactors. Water Res. 47, 7006–7018.
- 933 <https://doi.org/10.1016/j.watres.2013.08.043>
- 934 Weissbrodt, D.G., Shani, N., Holliger, C., 2014b. Linking bacterial population dynamics and
- 935 nutrient removal in the granular sludge biofilm ecosystem engineered for wastewater
- 936 treatment. FEMS Microbiol. Ecol. 88, 579–595. <https://doi.org/10.1111/1574-6941.12326>
- 937 Winkler, M.K.H., Meunier, C., Henriot, O., Mahillon, J., Suárez-Ojeda, M.E., Del Moro, G.,
- 938 De Sanctis, M., Di Iaconi, C., Weissbrodt, D.G., 2018. An integrative review of granular
- 939 sludge for the biological removal of nutrients and recalcitrant organic matter from
- 940 wastewater. Chem. Eng. J. 336, 489–502. <https://doi.org/10.1016/j.cej.2017.12.026>
- 941 Zubova, S.V., Melzer, M., Prokhorenko, I.R., 2005. Effect of environmental factors on the
- 942 composition of lipopolysaccharides released from the *Rhodobacter capsulatus* cell wall.
- 943 Izv. Akad. Nauk Seriya Biol. 168–173.

944

945 **Tables**

946

947 **Table 1.** Operational conditions of the three SBR regimes across the experimental period. SBR1  
 948 was run with a 24-h cycle composed of 20.75 h of reaction time and with  $257 \pm 54$  mg COD L<sup>-1</sup>  
 949 <sup>1</sup> in the bulk liquid phase after feeding. In SBR2, the total cycle length was shortened to 8 h,  
 950 with a reaction time of 4.75 h. In SBR3, the initial COD concentration was doubled compared  
 951 to the first two SBRs. All SBRs were run at a volume exchange ratio of 50%.

| Process parameters                                                                                  | Units                                                 | SBR1             | SBR2             | SBR3             |
|-----------------------------------------------------------------------------------------------------|-------------------------------------------------------|------------------|------------------|------------------|
| <b>SBR cycles</b>                                                                                   |                                                       |                  |                  |                  |
| Number of SBR cycles per day                                                                        | (-)                                                   | 1                | 3                | 3                |
| Reaction phase length per cycle                                                                     | (h)                                                   | 20.75            | 4.75             | 4.75             |
| Discharge, idle, feeding phases lengths                                                             | (min)                                                 | 5                | 5                | 5                |
| Settling phase length                                                                               | (h)                                                   | 3                | 3                | 3                |
| <b>Retention times</b>                                                                              |                                                       |                  |                  |                  |
| Hydraulic retention time (HRT)                                                                      | (h)                                                   | 48               | 16               | 16               |
| Sludge retention time (SRT) <sup>1</sup>                                                            | (d)                                                   | 1.5              | 7.2              | 10.6             |
| <b>Loadings</b>                                                                                     |                                                       |                  |                  |                  |
| Volumetric organic loading rate (OLR)                                                               | (g COD d <sup>-1</sup> L <sub>r</sub> <sup>-1</sup> ) | 0.215            | 0.645            | 1.29             |
| C:N:P ratio in the influent                                                                         | (m / m / m)                                           | 100 : 35.8 : 3.8 | 100 : 35.8 : 4.2 | 100 : 11.2 : 1.7 |
| <b>Measured initial concentrations in the bulk liquid phase at the beginning of reaction phases</b> |                                                       |                  |                  |                  |
| Acetate                                                                                             | (mg COD L <sup>-1</sup> )                             | $257 \pm 54$     | $232 \pm 18$     | $443 \pm 76$     |
| Ammonium                                                                                            | (mg N-NH <sub>4</sub> <sup>+</sup> L <sup>-1</sup> )  | $92 \pm 21$      | $83 \pm 16$      | $49 \pm 17$      |
| Orthophosphate                                                                                      | (mg P-PO <sub>4</sub> <sup>3+</sup> L <sup>-1</sup> ) | $9.7 \pm 1.3$    | $9.9 \pm 3.3$    | $7.7 \pm 1.1$    |

952 <sup>1</sup> The sludge retention time (SRT) was let freely evolve over the experimental period. The reactor was operated without purge  
 953 of biomass. The SRT increased as a result of biomass accumulation in the reactor. The median value over each SBR period is  
 954 provided. The distributions of SRT are displayed in Figure 2 and detailed evolutions in Supplementary material 3.



955 **Table 2.** Nutrient removal by the PNSB-enriched biomass in SBR1, SBR2, and SBR3 presented  
 956 as averages and maximal values of removal rates and removal percentages. Residual  
 957 concentration and removal percentages for COD met with European legislation limits for all  
 958 SBRs (averages above 90% removal, with residues close to 60 mg COD L<sup>-1</sup>). Ammonium and  
 959 orthophosphate were removed up to 77% and 73%, respectively, with residual concentrations  
 960 reaching 11 mg N-NH<sub>4</sub><sup>+</sup> L<sup>-1</sup> and 2 mg P-PO<sub>4</sub><sup>3-</sup> L<sup>-1</sup>.

| Chemical parameter                                       | Units                                 | SBR1          | SBR2          | SBR3          |
|----------------------------------------------------------|---------------------------------------|---------------|---------------|---------------|
| <b>Organic matter (as COD)</b>                           |                                       |               |               |               |
| Volumetric removal rates                                 | (kg d <sup>-1</sup> m <sup>-3</sup> ) | 0.220 ± 0.056 | 0.891 ± 0.235 | 1.019 ± 0.318 |
| Removal percentage                                       | (%)                                   | 96 ± 7        | 96 ± 11       | 91 ± 11       |
| Maximal volumetric removal rates                         | (kg d <sup>-1</sup> m <sup>-3</sup> ) | 0.387         | 1.488         | 2.437         |
| Maximal removal percentage                               | (%)                                   | 100           | 100           | 98            |
| Average residual concentrations                          | (mg L <sup>-1</sup> )                 | 67 ± 25       | 62 ± 32       | 61 ± 6        |
| <b>Ammonium (as N-NH<sub>4</sub><sup>+</sup>)</b>        |                                       |               |               |               |
| Volumetric removal rates                                 | (g d <sup>-1</sup> m <sup>-3</sup> )  | 26 ± 13       | 83 ± 35       | 113 ± 62      |
| Removal percentage                                       | (%)                                   | 53 ± 18       | 44 ± 10       | 77 ± 21       |
| Maximal volumetric removal rates                         | (g d <sup>-1</sup> m <sup>-3</sup> )  | 52            | 159           | 65            |
| Maximal removal percentage                               | (%)                                   | 83            | 60            | 94            |
| Average residual concentrations                          | (mg L <sup>-1</sup> )                 | 39 ± 16       | 39 ± 6        | 11 ± 7        |
| <b>Orthophosphate (as P-PO<sub>4</sub><sup>3-</sup>)</b> |                                       |               |               |               |
| Volumetric removal rates                                 | (g d <sup>-1</sup> m <sup>-3</sup> )  | 3 ± 1         | 11 ± 5        | 15 ± 5        |
| Removal percentage                                       | (%)                                   | 60 ± 11       | 45 ± 10       | 73 ± 14       |
| Maximal volumetric removal rates                         | (g d <sup>-1</sup> m <sup>-3</sup> )  | 5             | 18            | 25            |
| Maximal removal percentage                               | (%)                                   | 91            | 59            | 95            |
| Average residual concentrations                          | (mg L <sup>-1</sup> )                 | 4 ± 1         | 5 ± 1         | 2 ± 1         |

961

962 **Table 3.** Observed physiological parameters of the biomass of the PNSB mixed culture  
 963 extracted from the reaction periods of the initial batch and the three SBR periods, and  
 964 comparison with literature data obtained from pure-culture and mixed-culture PNSB systems.  
 965 The values are given based on measured COD units for the acetate substrate and absorbance-  
 966 calibrated VSS units for the biomass. The elemental formula for purple phototrophic bacteria  
 967  $C_1H_{1.8}O_{0.38}N_{0.18}$  ( $4.5 \text{ mol e}^- \text{ C-mol}^{-1}$ ,  $36 \text{ g COD C-mol}^{-1}$ ,  $22.4 \text{ g VSS C-mol}^{-1}$ ,  $1.607 \text{ g COD}_X$   
 968  $\text{g}^{-1} \text{ VSS}$ ) (Puyol et al., 2017a) may be used for conversion of VSS in to COD units.

| System             | $q_{S,\max}$<br>( $\text{g COD}_S \text{ d}^{-1} \text{ g}^{-1} \text{ VSS}$ ) | $Y_{X/S,\max}$<br>( $\text{g VSS g}^{-1} \text{ COD}_S$ ) | $\mu_{\max}$<br>( $\text{d}^{-1}$ ) |
|--------------------|--------------------------------------------------------------------------------|-----------------------------------------------------------|-------------------------------------|
| PNSB pure cultures | n.a.                                                                           | 0.98-1.23 <sup>a</sup>                                    | 5.28 <sup>a</sup>                   |
| PNSB mixed culture | n.a.                                                                           | 0.23-0.63 <sup>b</sup>                                    | 0.72-1.68 <sup>b</sup>              |
| Initial batch      | 5.76                                                                           | 0.39                                                      | 2.16                                |
| SBR1 <sup>c</sup>  | $13.68 \pm 5.04$                                                               | $0.23 \pm 0.02$                                           | $3.36 \pm 1.4$                      |
| SBR2 <sup>c</sup>  | $1.76 \pm 0.91$                                                                | n.a. <sup>d</sup>                                         | n.a. <sup>d</sup>                   |
| SBR3 <sup>c</sup>  | $2.22 \pm 0.79$                                                                | n.a. <sup>d</sup>                                         | n.a. <sup>d</sup>                   |

969 <sup>a</sup> Taken from literature (Eroglu et al., 1999; Jih, 1998)

970 <sup>b</sup> Taken from literature (Hülßen et al., 2016; Hülßen et al., 2014; Kaewsuk et al., 2010; Puyol et al., 2017)

971 <sup>c</sup> Average values collected over different cycles monitored over SBR1 (cycles 11, 17), SBR2 (cycles 21, 145,  
 972 166), and SBR3 (cycles 10, 31, 49, 91).

973 <sup>d</sup> High biomass concentrations in the system. VSS and absorbance measurement are no sensitive enough to  
 974 detect growth over reaction period. External batches with diluted biomass should be performed to this end.  
 975

976 **Figures and figure legends**

977

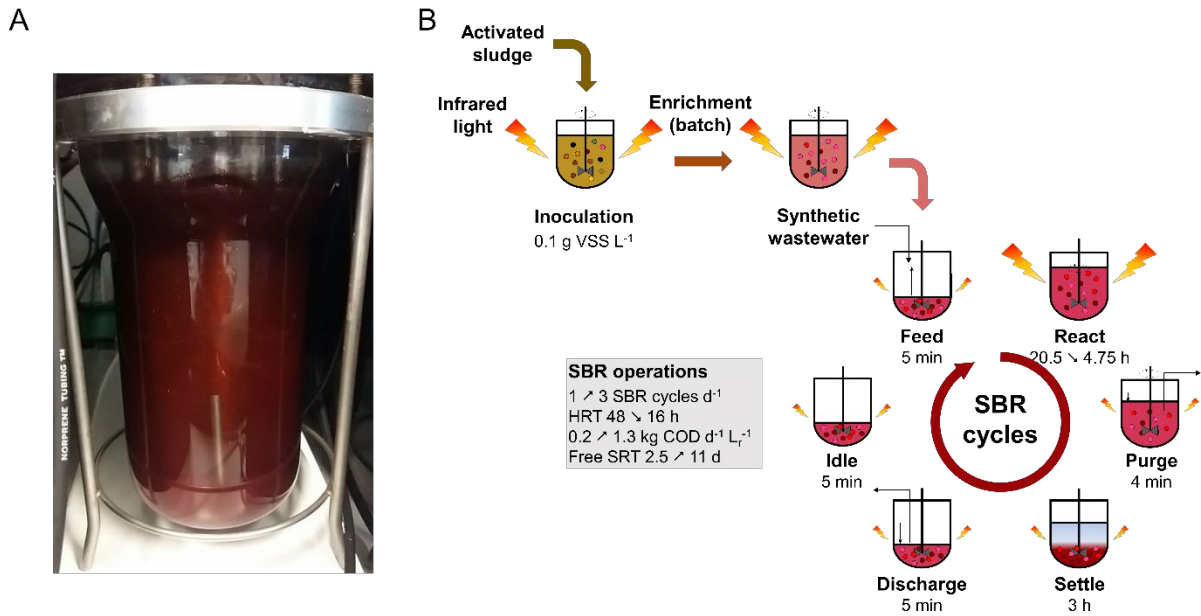

978

979 **Figure 1.** Reactor system and operation **A:** Stirred-tank photobioreactor enriched in PNSB.

980 **B:** PNSB enrichment strategy from activated sludge under SBR regimes. The reactor was  
981 inoculated at 0.1 g VSS L<sup>-1</sup> with BNR activated sludge. One initial batch of 40 h was used to  
982 activate the biomass and test the enrichment of PNSB prior to switching to SBR operation  
983 over 5 months.

984



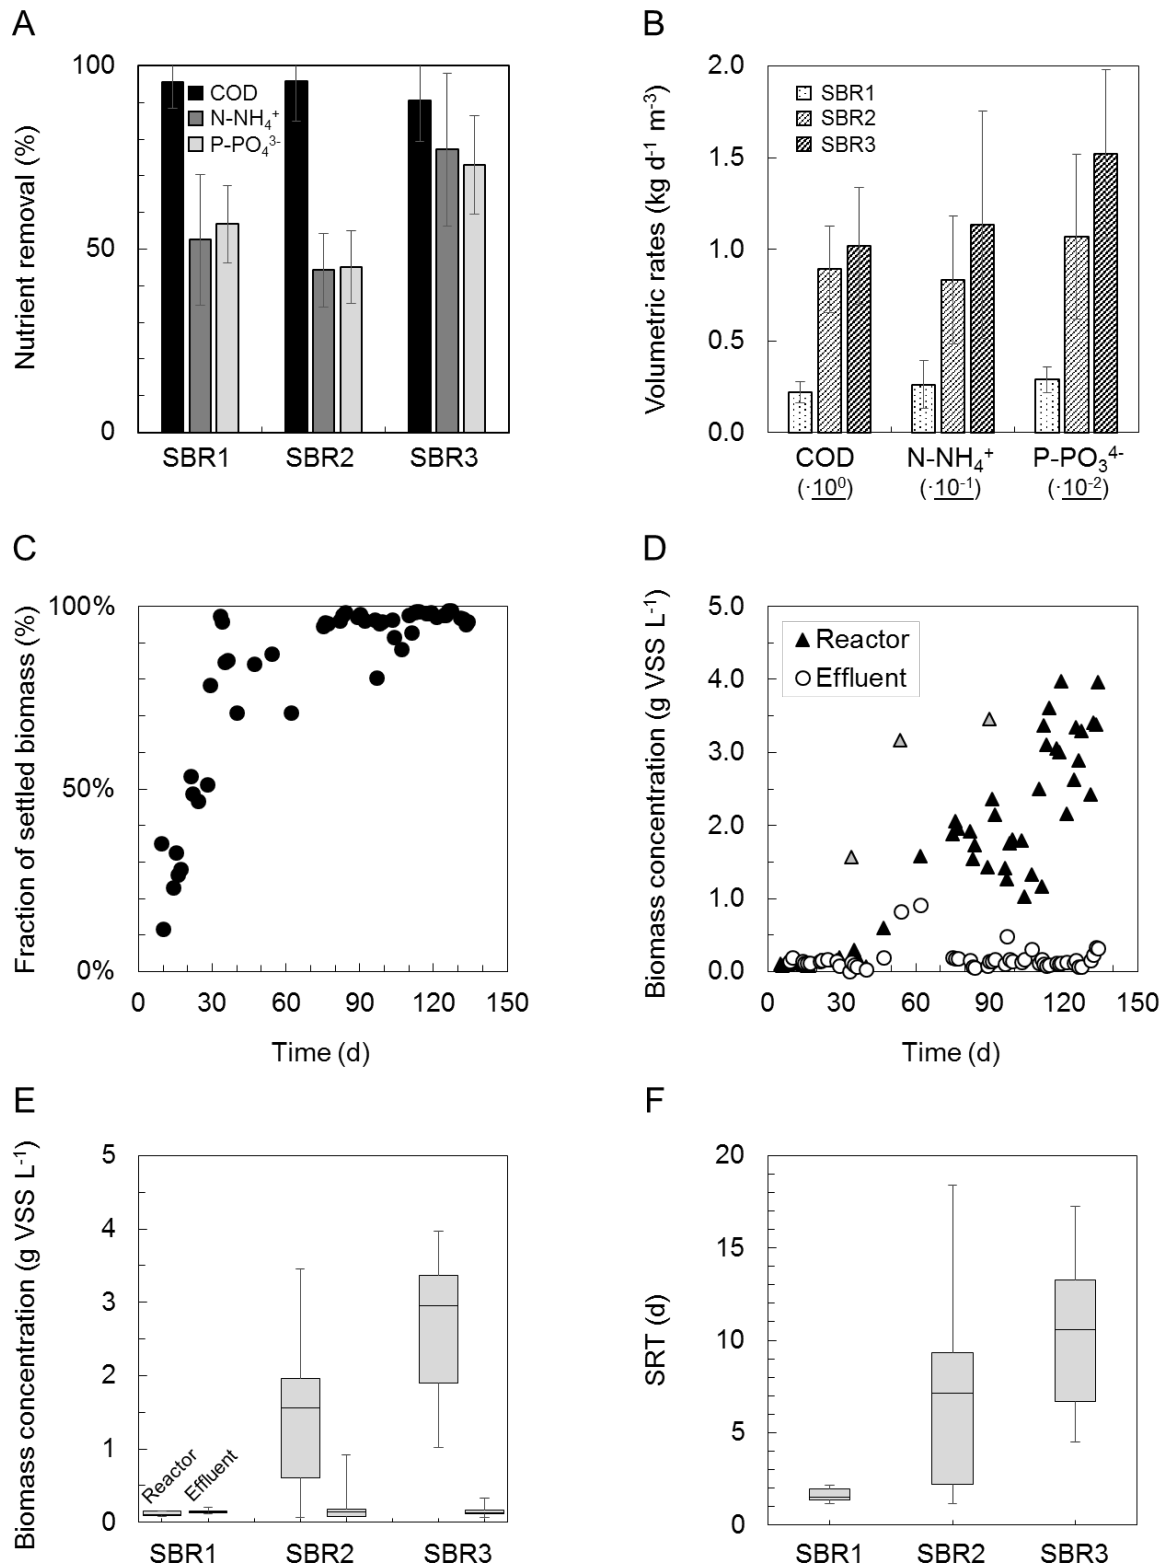

985

986

987 **Figure 2.** Nutrient removal and biomass characteristics across SBR operations in the mixed-

988 culture PNSB photobioreactor. **A:** Increases in COD, ammonium, and orthophosphate nutrient

989 removal percentages from SBR1 to SBR3. On average, 95% of the COD was removed during  
990 all operational states.  $\text{N-NH}_4^+$  and  $\text{P-PO}_4^{3-}$  reached 77% and 73% of removal from the synthetic  
991 influent. **B:** Gradual increases in volumetric rates of C-N-P nutrient removals from SBR1 to  
992 SBR3. **C:** Increase in the fraction of mixed-liquor biomass that settled in the bioreactor along  
993 SBR1 (days 3-30), SBR2 (days 30-100), and SBR3 (days 100-135) after inoculation with BNR  
994 activated sludge and a first batch of 40 h. **D:** Accumulation of biomass in the photobioreactor  
995 from SBR1 to SBR2 and SBR3. The grey triangles relate to cleanings and resuspensions of the  
996 wall biofilm in the biosystem. They indicate the total amount of biomass that accumulated in  
997 the reactor. **E:** Distributions of biomass concentrations in the reactor at the end of the reaction  
998 phase and in the effluent after settling. The settling ability of the biomass increased steadily  
999 during SBR operations. The residual biomass concentration in suspension at the end of the  
1000 settling phase in SBR3 was 10 times lower than the concentration in the mixed liquor during  
1001 reaction time, displaying the well-settling property of the PNSB-enriched biomass. **F:** The SRT  
1002 was let freely evolve in the reactor, increasing from median values of 2 d (SBR1) to 7.5 d  
1003 (SBR2) and 11 d (SBR3) along with biomass accumulation.

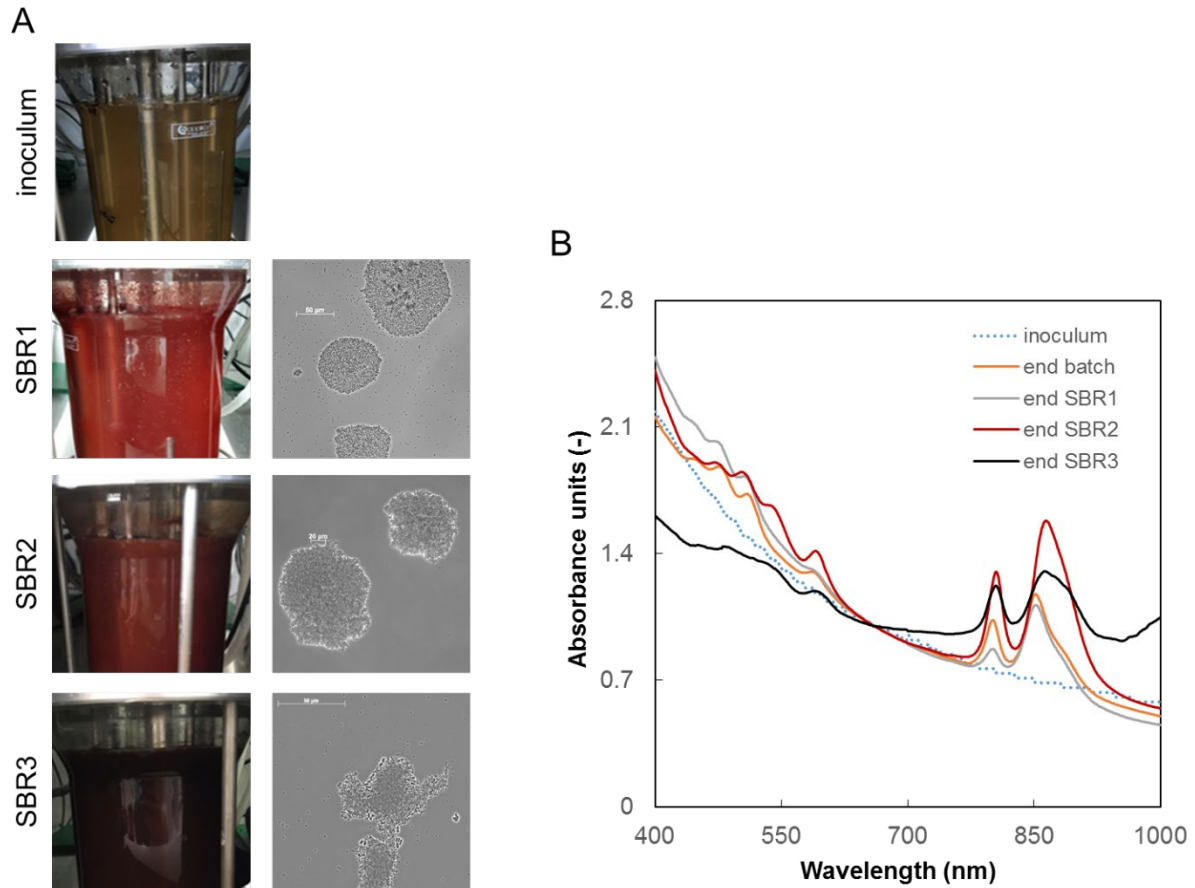

1004

1005 **Figure 3.** Evolution of the pigmentation and aggregative characteristics of the PNSB-enriched  
1006 biomass. **A:** Pictures of the PNSB-enriched biomass taken with a digital camera and phase-  
1007 contrast microscopy images of the aggregates present in SBR1 to SBR3. The biomass in the  
1008 reactor changed from brown to purple-red colour during the enrichment after inoculation with  
1009 activated sludge. The size of the aggregates increased during time along with increased settling  
1010 abilities of the biomass. **B:** Wavelength scans of intact cultures, normalized for the biomass  
1011 content (at 660 nm). The presence of PNSB was tracked at peaks around 800-900 nm (coding  
1012 for Bchl a) and 400-500 nm (carotenoids). After the initial batch phase of 40 h, the peaks typical  
1013 for PNSB pigments were present, and persisted in the biomass until the end of SBR3.

1014

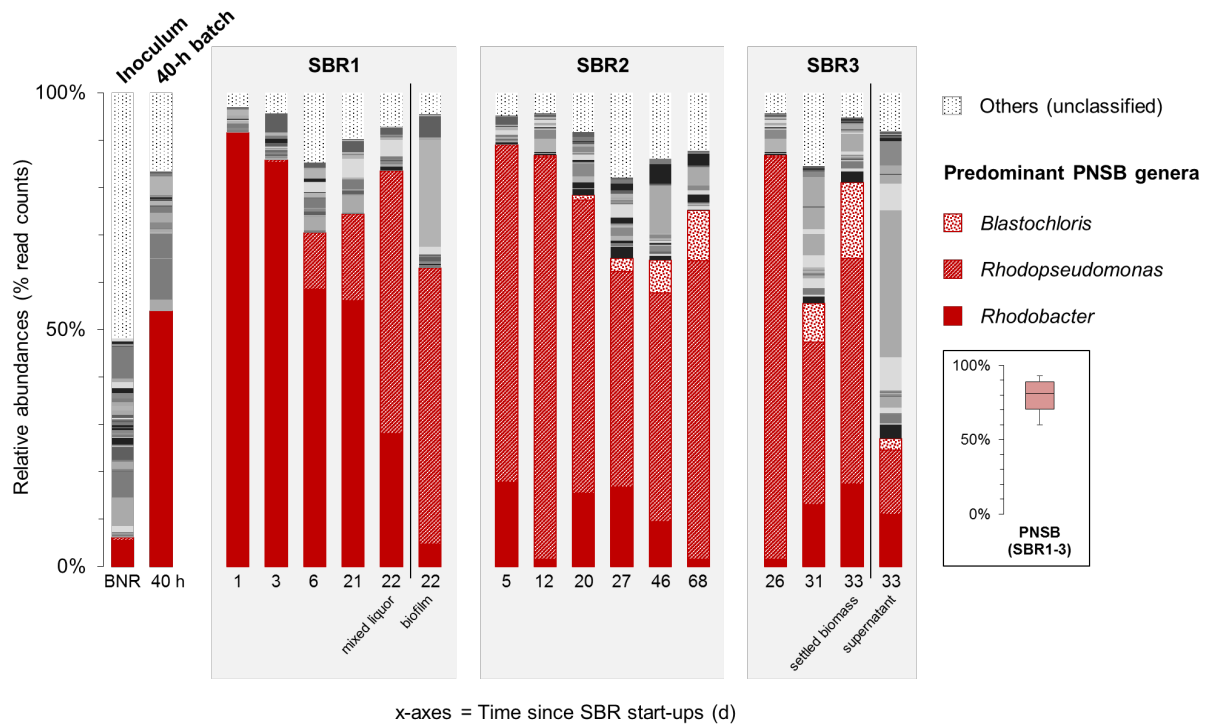

1015

1016 **Figure 4.** Time series of V3-V4 16S rRNA gene amplicon sequencing of bacterial community

1017 compositions in the PNSB-enriched mixed-culture process along SBR regime shifts. After

1018 inoculating the reactor with BNR activated sludge (“BNR”), a first PNSB genus *Rhodobacter*

1019 was initially enriched during the first 40-h batch (“40 h”) and early SBR1 period. The second

1020 PNSB genus *Rhodopseudomonas* was predominantly selected across operations of SBR2 and

1021 SBR3. The third PNSB genus *Blastochloris* popped up by end of SBR2 and SBR3. The PNSB

1022 guild remained predominant in the biomass across the process with an average total relative

1023 abundance of sequencing reads affiliated to known PNSB above 60% of the total community

1024 dataset (median = 81%; min-max = 60-93%). In SBR1, both the mixed liquor and the wall

1025 biofilm were sampled on day 22 and sequenced. In SBR3, both the settled biomass and s were

1026 sampled on day 33 after settling, and sequenced. The full set of genera is given in

1027 Supplementary material 5.

1028
